# Supplementary material for: New Immunosuppressive Sphingoid Base and Ceramide Analogues in Wild Cordyceps
Source: PubMed Central journal article supplement (PMC5155214; doi:10.1038/srep38641), 2016-12-14

**Supplementary Information**

**New Immunosuppressive Sphingoid Base and Ceramide Analogues in Wild Cordyceps**

**Jia-Ning Mi, Yuwei Han, Yingqiong Xu, Junping Kou, Jing-Rong Wang and Zhi-Hong Jiang**

**Table S1.** 346 SPLs identified including 171 new SPLs (bolded) from wild Cordyceps by using UHPLC-UHD-Q-TOF-MS/MS.

| No.       | Name                | Formula             | RT          | Score        | Diff (ppm)   | Theoretical [M+H] <sup>+</sup> (m/z) | [M+H] <sup>+</sup> (m/z) | MS/MS fragment (m/z)                  |
|-----------|---------------------|---------------------|-------------|--------------|--------------|--------------------------------------|--------------------------|---------------------------------------|
| 1         | Sa (d14:0)          | C14 H31 N O2        | 4.99        | 82.86        | 0.02         | 246.2428                             | 246.2430                 | 228.2321, 60.0443                     |
| 2         | So (d14:1)          | C14 H29 N O2        | 4.40        | 80.77        | -2.03        | 244.2271                             | 244.2275                 | 226.2196, 60.0436                     |
| 3         | So (d14:2)          | C14 H27 N O2        | 3.25        | 85.66        | -1.93        | 242.2115                             | 242.2115                 | 224.2015, 206.1881, 60.0440           |
| 4         | So (d14:3)          | C14 H25 N O2        | 2.10        | 65.07        | -0.18        | 240.1958                             | 240.1958                 | 222.1917, 60.0445                     |
| 5         | So (d15:1)          | C15 H31 N O2        | 6.70        | 68.91        | -1.77        | 258.2428                             | 258.2429                 | 240.2321, 222.1492                    |
| 6         | So (d16:1)          | C16 H33 N O2        | 7.05        | 64.91        | -2.12        | 272.2584                             | 272.2585                 | 254.2504, 60.0420                     |
| 7         | Sa (d17:0)          | C17 H37 N O2        | 5.15        | 99.28        | 0.80         | 288.2897                             | 288.2900                 | 270.2799                              |
| 8         | Sa (d18:0)          | C18 H39 N O2        | 6.97        | 79.10        | -2.56        | 302.3054                             | 302.3052                 | 284.2957, 266.2838, 254.278, 60.0445  |
| 9         | So (d18:1)          | C18 H37 N O2        | 6.60        | 90.13        | -3.23        | 300.2897                             | 300.2890                 | 282.2510, 264.2360, 60.0441           |
| <b>10</b> | <b>So (d18:5) *</b> | <b>C18 H29 N O2</b> | <b>2.67</b> | <b>97.56</b> | <b>-0.36</b> | <b>292.2271</b>                      | <b>292.2272</b>          | <b>274.2159, 256.2152</b>             |
| 11        | So (d19:1)          | C19 H39 N O2        | 8.25        | 74.08        | -1.60        | 314.3054                             | 314.3049                 | 296.2948, 60.0438                     |
| 12        | So (d19:2)          | C19 H37 N O2        | 6.64        | 97.44        | 0.76         | 312.2897                             | 312.2899                 | 294.2788, 276.2700, 264.2691, 60.0445 |
| 13        | So (d20:2)          | C20 H39 N O2        | 7.52        | 76.00        | -1.98        | 326.3054                             | 326.3052                 | 308.2914, 290.2954, 60.0443           |
| <b>14</b> | <b>So (d20:3)</b>   | <b>C20 H37 N O2</b> | <b>7.79</b> | <b>97.21</b> | <b>0.44</b>  | <b>324.2897</b>                      | <b>324.2899</b>          | <b>306.2820, 60.0418</b>              |
| 15        | So (d22:1)          | C22 H45 N O2        | 10.64       | 86.20        | -3.88        | 356.3523                             | 356.3515                 | 338.3456                              |
| 16        | So (d22:1) isomer   | C22 H45 N O2        | 10.17       | 82.52        | -2.07        | 356.3523                             | 356.3517                 | 338.3203                              |
| 17        | So (d22:2)          | C22 H43 N O2        | 8.60        | 96.71        | 0.03         | 354.3367                             | 354.3366                 | 336.3258                              |
| 18        | So (d22:3)          | C22 H41 N O2        | 7.67        | 91.82        | 0.24         | 352.3210                             | 352.3209                 | 334.3107, 316.3009, 60.0445           |
| <b>19</b> | <b>So (d22:5)</b>   | <b>C22 H37 N O2</b> | <b>6.92</b> | <b>63.69</b> | <b>-4.81</b> | <b>348.2897</b>                      | <b>348.2878</b>          | <b>330.2419, 60.0445</b>              |

|           |                          |                     |              |              |              |                 |                 |                                                                            |
|-----------|--------------------------|---------------------|--------------|--------------|--------------|-----------------|-----------------|----------------------------------------------------------------------------|
| <b>20</b> | <b>So (t15:2)</b>        | <b>C15 H29 N O3</b> | <b>3.59</b>  | <b>98.64</b> | <b>-0.37</b> | <b>272.2220</b> | <b>272.2220</b> | <b>254.1970, 60.0445</b>                                                   |
| <b>21</b> | <b>So (t15:3)</b>        | <b>C15 H27 N O3</b> | <b>2.97</b>  | <b>72.86</b> | <b>-0.61</b> | <b>270.2064</b> | <b>270.2065</b> | <b>252.1951</b>                                                            |
| 22        | Sa (t16:0)               | C16 H35 N O3        | 5.12         | 85.55        | -0.02        | 290.2691        | 290.2689        | 272.2527, 254.2401, 236.1139, 242.2471, 60.0438                            |
| 23        | Sa (t18:0)               | C18 H39 N O3        | 6.67         | 97.40        | 0.92         | 318.3003        | 318.3006        | 300.2891, 282.2786, 264.2682, 60.0444                                      |
| 24        | So (t18:1)               | C18 H37 N O3        | 6.40         | 97.11        | 0.52         | 316.2846        | 316.2848        | 298.2741, 280.2635, 262.2529, 250.2535, 60.0445                            |
| 25        | So (t18:2)               | C18 H35 N O3        | 6.87         | 84.21        | 1.80         | 314.2690        | 314.2697        | 296.2599, 278.2532, 60.0443                                                |
| 26        | So (t19:1)               | C19 H39 N O3        | 7.32         | 98.97        | 0.06         | 330.3003        | 330.3004        | 312.2897, 294.2783, 60.0446                                                |
| <b>27</b> | <b>So (t19:2)</b>        | <b>C19 H37 N O3</b> | <b>6.90</b>  | <b>98.38</b> | <b>-0.29</b> | <b>328.2846</b> | <b>328.2845</b> | <b>310.2738, 298.2743, 292.2637, 280.2638, 274.2572, 262.2534, 60.0444</b> |
| 28        | So (t20:1)               | C20 H41 N O3        | 7.29         | 69.92        | -2.16        | 344.3159        | 344.3154        | 326.2834, 308.2549, 60.0445                                                |
| <b>29</b> | <b>So (t21:3)</b>        | <b>C21 H39 N O3</b> | <b>9.25</b>  | <b>88.05</b> | <b>-2.07</b> | <b>354.3003</b> | <b>354.3002</b> | <b>336.2901</b>                                                            |
| <b>30</b> | <b>So (t21:4)</b>        | <b>C21 H37 N O3</b> | <b>7.94</b>  | <b>72.60</b> | <b>1.27</b>  | <b>352.2846</b> | <b>352.2853</b> | <b>334.2744, 316.2596</b>                                                  |
| 31        | Sa (t22:0)               | C22 H47 N O3        | 8.02         | 98.41        | -1.43        | 374.3629        | 374.3624        | 356.3153, 338.3074, 320.2462                                               |
| 32        | So (t22:1)               | C22 H45 N O3        | 8.10         | 75.99        | -2.15        | 372.3472        | 372.3466        | 354.3018, 336.3284                                                         |
| 33        | So (t22:2)               | C22 H43 N O3        | 7.59         | 63.48        | -2.94        | 370.3316        | 370.3312        | 352.2858, 334.2853, 316.2329, 60.0444                                      |
| 34        | So (t23:4)               | C23 H41 N O3        | 9.50         | 74.92        | 1.12         | 380.3159        | 380.3161        | 362.3060                                                                   |
| 35        | So (m14:3)               | C14 H25 N O         | 3.72         | 84.63        | -0.95        | 224.2009        | 224.2014        | 206.1902                                                                   |
| 36        | Sa (m17:0)               | C17 H37 N O         | 6.74         | 86.06        | 1.37         | 272.2948        | 272.2952        | 254.2502                                                                   |
| 37        | Sa (m18:0)               | C18 H39 N O         | 7.20         | 98.31        | -1.73        | 286.3104        | 286.3110        | 268.2989                                                                   |
| 38        | So (m18:1)               | C18 H37 N O         | 6.95         | 83.22        | 0.68         | 284.2948        | 284.2948        | 266.2868                                                                   |
| <b>39</b> | <b>So (m22:1)</b>        | <b>C22 H45 N O</b>  | <b>11.12</b> | <b>96.58</b> | <b>0.53</b>  | <b>340.3574</b> | <b>340.3577</b> | <b>322.3447</b>                                                            |
| <b>40</b> | <b>So (m22:2)</b>        | <b>C22 H43 N O</b>  | <b>9.47</b>  | <b>99.21</b> | <b>-0.76</b> | <b>338.3417</b> | <b>338.3416</b> | <b>320.3321</b>                                                            |
| <b>41</b> | <b>So (m22:3)</b>        | <b>C22 H41 N O</b>  | <b>7.60</b>  | <b>98.61</b> | <b>0.64</b>  | <b>336.3261</b> | <b>336.3263</b> | <b>318.3153</b>                                                            |
| <b>42</b> | <b>So (m22:3) isomer</b> | <b>C22 H41 N O</b>  | <b>9.92</b>  | <b>84.94</b> | <b>0.03</b>  | <b>336.3261</b> | <b>336.3261</b> | <b>318.3134</b>                                                            |

|    |                                |                     |              |              |              |                 |                 |                                                                                      |
|----|--------------------------------|---------------------|--------------|--------------|--------------|-----------------|-----------------|--------------------------------------------------------------------------------------|
| 43 | Sphingofungin A                | C21 H41 N3 O6       | 9.34         | 89.37        | -1.50        | 432.3068        | 432.3064        | 414.3447, 396.3327, 378.3281                                                         |
| 44 | <b>Cer (m14:2/18:2)</b>        | <b>C32 H57 N O2</b> | <b>10.78</b> | <b>88.80</b> | <b>-3.12</b> | <b>488.4462</b> | <b>488.4452</b> | <b>470.3669, 226.2164, 208.2063, 196.2068, 44.0482</b>                               |
| 45 | <b>Cer (m14:3/18:2)</b>        | <b>C32 H55 N O2</b> | <b>10.52</b> | <b>95.97</b> | <b>-0.47</b> | <b>486.4306</b> | <b>486.4305</b> | <b>468.4108, 224.2015, 206.1907, 194.1904, 44.0483</b>                               |
| 46 | <b>Cer (m14:3/18:2) isomer</b> | <b>C32 H55 N O2</b> | <b>9.27</b>  | <b>79.44</b> | <b>-5.25</b> | <b>486.4306</b> | <b>486.4282</b> | <b>468.3868, 206.1906</b>                                                            |
| 47 | <b>Cer (m14:3/24:1)</b>        | <b>C38 H69 N O2</b> | <b>14.27</b> | <b>96.33</b> | <b>-1.41</b> | <b>572.5401</b> | <b>572.5395</b> | <b>554.5282, 224.2013, 206.1909, 194.1909, 44.0484</b>                               |
| 48 | <b>Cer (m15:1/5:0)</b>         | <b>C20 H39 N O2</b> | <b>8.55</b>  | <b>99.05</b> | <b>1.22</b>  | <b>326.3054</b> | <b>326.3058</b> | <b>308.2948, 224.2011</b>                                                            |
| 49 | <b>Cer (m15:2/18:2)</b>        | <b>C33 H59 N O2</b> | <b>11.68</b> | <b>98.70</b> | <b>1.10</b>  | <b>502.4619</b> | <b>502.4613</b> | <b>484.4546, 240.2323, 222.2219, 210.2215, 44.0483</b>                               |
| 50 | <b>Cer (m15:3/18:1)</b>        | <b>C33 H59 N O2</b> | <b>11.40</b> | <b>90.67</b> | <b>-1.07</b> | <b>502.4619</b> | <b>502.4617</b> | <b>484.4170, 238.2164, 220.2065, 208.2060, 44.0482</b>                               |
| 51 | <b>Cer (m16:3/18:1)</b>        | <b>C34 H61 N O2</b> | <b>11.88</b> | <b>86.43</b> | <b>-3.35</b> | <b>516.4775</b> | <b>516.4757</b> | <b>498.4709, 252.2318, 234.2216, 222.2223, 44.0483</b>                               |
| 52 | <b>Cer (m16:3/22:1)</b>        | <b>C38 H69 N O2</b> | <b>14.68</b> | <b>76.67</b> | <b>1.40</b>  | <b>572.5401</b> | <b>572.5403</b> | <b>554.5358, 252.2135, 234.2220, 222.2222, 44.0483</b>                               |
| 53 | <b>Cer (m18:2/3:0)</b>         | <b>C21 H39 N O2</b> | <b>7.82</b>  | <b>99.01</b> | <b>-0.02</b> | <b>338.3054</b> | <b>338.3050</b> | <b>264.2679</b>                                                                      |
| 54 | <b>Cer (m18:2/19:0)</b>        | <b>C37 H71 N O2</b> | <b>15.28</b> | <b>95.01</b> | <b>-0.75</b> | <b>562.5558</b> | <b>562.5555</b> | <b>544.5445, 282.2789, 264.2681, 252.2704, 44.0484</b>                               |
| 55 | <b>Cer (m18:3/18:1)</b>        | <b>C36 H65 N O2</b> | <b>12.98</b> | <b>97.15</b> | <b>-0.21</b> | <b>544.5088</b> | <b>544.5088</b> | <b>526.4965, 280.2627, 262.2525, 250.2529, 44.0483</b>                               |
| 56 | <b>Cer (m18:3/18:2)</b>        | <b>C36 H63 N O2</b> | <b>12.22</b> | <b>94.15</b> | <b>-0.39</b> | <b>542.4932</b> | <b>542.4931</b> | <b>524.4831, 280.2628, 262.2521, 250.2531, 44.0483</b>                               |
| 57 | <b>Cer (m18:5/5:0)</b>         | <b>C23 H37 N O2</b> | <b>7.53</b>  | <b>99.45</b> | <b>0.87</b>  | <b>360.2897</b> | <b>360.2900</b> | <b>342.2793, 258.2229</b>                                                            |
| 58 | <b>Cer (m19:4/16:0)</b>        | <b>C35 H63 N O2</b> | <b>10.78</b> | <b>97.11</b> | <b>-1.79</b> | <b>530.4932</b> | <b>530.4923</b> | <b>512.4818, 292.2627, 274.2528, 262.2527, 44.0482</b>                               |
| 59 | <b>Cer (m19:3/17:0)</b>        | <b>C35 H65 N O2</b> | <b>13.43</b> | <b>95.84</b> | <b>-0.78</b> | <b>532.5088</b> | <b>532.5093</b> | <b>514.4972, 294.2784, 276.2681, 264.2681, 44.0483</b>                               |
| 60 | <b>Cer (d14:0/16:0)</b>        | <b>C30 H61 N O3</b> | 11.25        | 93.31        | 1.77         | 484.4724        | 484.4710        | 466.4612, 448.4499, 246.2411, 228.2317, 210.2203, 198.2203                           |
| 61 | <b>Cer (d14:0/18:0)</b>        | <b>C32 H65 N O3</b> | 12.47        | 96.42        | -1.61        | 512.5037        | 512.5031        | 494.4912, 476.4834, 246.2453, 228.2326, 210.2220, 198.2216, 60.0445                  |
| 62 | <b>Cer (d14:0/18:1)</b>        | <b>C32 H63 N O3</b> | <b>11.67</b> | <b>84.13</b> | <b>-3.03</b> | <b>510.4881</b> | <b>510.4865</b> | <b>492.4745, 474.4684, 462.3501, 246.2431, 228.2322, 210.2218, 198.2218, 60.0444</b> |
| 63 | <b>Cer (d14:0/20:0)</b>        | <b>C34 H69 N O3</b> | 13.68        | 98.35        | -0.79        | 540.5350        | 540.5453        | 522.5236, 504.5230, 246.2427, 228.2325, 210.2221, 198.2220, 60.0445                  |
| 64 | <b>Cer (d14:0/22:0)</b>        | <b>C36 H73 N O3</b> | <b>15.08</b> | <b>99.04</b> | <b>-0.34</b> | <b>568.5663</b> | <b>568.5661</b> | <b>550.5549, 532.5438, 246.2438, 228.2325, 210.2220, 198.2221, 60.0444</b>           |

|           |                         |                     |              |              |              |                 |                 |                                                                               |
|-----------|-------------------------|---------------------|--------------|--------------|--------------|-----------------|-----------------|-------------------------------------------------------------------------------|
| <b>65</b> | <b>Cer (d14:0/23:0)</b> | <b>C37 H75 N O3</b> | <b>15.77</b> | <b>95.74</b> | <b>-1.36</b> | <b>582.5820</b> | <b>582.5813</b> | <b>564.5697, 546.5581, 246.2430, 228.2323, 210.2217, 198.2223, 60.0444</b>    |
| 66        | Cer (d14:0/24:0)        | C38 H77 N O3        | 16.38        | 96.05        | -0.79        | 596.5976        | 596.5982        | 578.5862, 560.5761, 246.2435, 228.2324, 210.2222, 198.2221, 60.0444           |
| 67        | Cer (d16:0/20:0)        | C36 H73 N O3        | 15.06        | 98.41        | -1.11        | 568.5663        | 568.5669        | 550.5550, 532.5435, 520.5305, 274.2729, 256.2626, 238.2517, 226.2522, 60.0439 |
| <b>68</b> | <b>Cer (d16:0/22:0)</b> | <b>C38 H77 N O3</b> | <b>16.40</b> | <b>97.75</b> | <b>-0.80</b> | <b>596.5976</b> | <b>596.5973</b> | <b>578.5862, 560.5761, 274.2731, 256.2637, 238.2533, 226.253, 60.0444</b>     |
| <b>69</b> | <b>Cer (d16:0/23:0)</b> | <b>C39 H79 N O3</b> | <b>17.02</b> | <b>89.50</b> | <b>-2.81</b> | <b>610.6133</b> | <b>610.6120</b> | <b>592.6018, 574.5929, 274.2718, 256.2638, 238.2528, 226.2522, 60.0444</b>    |
| 70        | Cer (d18:0/16:0)        | C34 H69 N O3        | 13.50        | 98.72        | -0.27        | 540.5350        | 540.5349        | 522.5236, 504.5130, 302.3046, 284.2944, 266.2841, 254.2839, 60.0445           |
| 71        | Cer (d18:0/17:0)        | C35 H71 N O3        | 14.30        | 63.16        | 7.99         | 554.5507        | 554.5472        | 536.5386, 518.5276, 302.3016, 284.2929, 266.2833, 60.0438                     |
| 72        | Cer (d18:0/18:0)        | C36 H73 N O3        | 15.00        | 98.27        | -1.19        | 568.5663        | 568.5669        | 550.5544, 532.5438, 302.3084, 284.2946, 266.2841, 254.2842, 60.0444           |
| 73        | Cer (d18:0/18:1)        | C36 H71 N O3        | 14.85        | 95.87        | -0.83        | 566.5507        | 566.5511        | 302.3084, 284.2948, 266.2843, 254.2842, 60.0445                               |
| 74        | Cer (d18:0/18:2)        | C36 H69 N O3        | 13.98        | 65.50        | -2.34        | 564.5350        | 564.5348        | 546.5240, 528.5161, 516.5123, 284.2947, 266.2841, 254.2837, 60.0444           |
| 75        | Cer (d18:0/20:0)        | C38 H77 N O3        | 16.60        | 96.69        | -0.81        | 596.5976        | 596.5982        | 578.5863, 560.5765, 302.3031, 284.2945, 266.2836, 60.0437                     |
| 76        | Cer (d18:0/22:0) isomer | C40 H81 N O3        | 17.72        | 95.99        | -2.10        | 624.6289        | 624.6277        | 606.6163, 588.6055, 302.3052, 284.2949, 266.2838, 254.2844, 60.0444           |
| 77        | Cer (d18:0/22:0)        | C40 H81 N O3        | 17.97        | 89.99        | -3.09        | 624.6289        | 624.6275        | 606.6174, 588.6058, 302.3078, 284.2948, 266.2840, 254.2833, 60.0444           |
| 78        | Cer (d18:0/23:0)        | C41 H83 N O3        | 18.55        | 85.94        | -3.16        | 638.6446        | 638.6433        | 620.6329, 602.6228, 302.3032, 284.2955, 266.2831, 254.2871, 60.0444           |
| 79        | Cer (d18:0/24:0)        | C42 H85 N O3        | 19.40        | 92.59        | -2.90        | 652.6602        | 652.6588        | 634.6487, 616.6352, 302.3084, 284.2948, 266.2841, 254.2843, 60.0445           |
| 80        | Cer (d18:0/24:1)        | C42 H83 N O3        | 17.96        | 89.09        | -0.90        | 650.6446        | 650.6431        | 632.6302, 614.6142, 302.3016, 284.2921, 266.2827, 254.2727, 60.0439           |
| 81        | Cer (d18:0/25:0)        | C43 H87 N O3        | 20.20        | 88.62        | -3.50        | 666.6759        | 666.6737        | 648.6634, 630.6514, 302.3073, 284.2943, 266.2824, 254.2831, 60.0444           |
| 82        | Cer (d18:0/26:0)        | C44 H89 N O3        | 21.00        | 90.71        | -2.91        | 680.6915        | 680.6901        | 662.6796, 644.6697, 302.3083, 284.2947, 266.2844, 254.2847, 60.0444           |
| <b>83</b> | <b>Cer (d20:0/25:0)</b> | <b>C45 H91 N O3</b> | <b>21.84</b> | <b>82.72</b> | <b>-3.64</b> | <b>694.7072</b> | <b>694.7056</b> | <b>676.6960, 658.6845, 330.3371, 312.3255, 294.3154, 282.3139, 60.0445</b>    |
| 84        | Cer (d20:0/26:0)        | C46 H93 N O3        | 22.40        | 91.72        | -2.57        | 708.7228        | 708.7216        | 690.7108, 672.6992, 660.6947, 330.3376, 312.3259, 294.3168, 282.3158, 60.0444 |
| <b>85</b> | <b>Cer (d22:0/25:0)</b> | <b>C47 H95 N O3</b> | <b>22.90</b> | <b>87.17</b> | <b>-3.46</b> | <b>722.7385</b> | <b>722.7365</b> | <b>704.7256, 686.7147, 358.3704, 340.3566, 322.3473, 310.3485, 60.0445</b>    |

|    |                      |               |       |       |       |          |          |                                                                                                   |
|----|----------------------|---------------|-------|-------|-------|----------|----------|---------------------------------------------------------------------------------------------------|
| 86 | Cer (d22:0/26:0)     | C48 H97 N O3  | 23.29 | 94.06 | -2.63 | 736.7541 | 736.7526 | 718.7423, 700.7305, 358.3706, 340.3573, 322.3466, 60.0444                                         |
| 87 | Cer (d24:0/26:0)     | C50 H101 N O3 | 24.22 | 83.57 | -1.74 | 764.7854 | 764.7829 | 746.7729, 728.7612, 396.4187, 386.4028, 368.3890, 350.3746, 338.3770, 60.0444                     |
| 88 | Cer (d25:0/24:0)     | C49 H99 N O3  | 23.75 | 88.87 | -3.37 | 750.7698 | 750.7671 | 732.7573, 714.7453, 382.4034, 364.3927, 352.3752, 60.0442                                         |
| 89 | Cer (d18:0/16:0(OH)) | C34 H69 N O4  | 13.17 | 70.07 | -2.68 | 556.5299 | 556.5290 | 538.5192, 520.5085, 502.4947, 490.4969, 302.3046, 284.2952, 266.2845, 254.2844, 60.0444           |
| 90 | Cer (d18:0/20:0(OH)) | C38 H77 N O4  | 15.75 | 64.18 | -4.15 | 612.5925 | 612.5923 | 594.5814, 576.5713, 558.5542, 302.3026, 284.2956, 266.2837, 254.2809, 60.0444                     |
| 91 | Cer (d18:0/24:0(OH)) | C42 H85 N O4  | 18.57 | 93.69 | -1.60 | 668.6551 | 668.6543 | 650.6424, 632.6333, 614.6246, 602.6232, 302.3037, 284.2948, 266.2842, 254.284, 60.0444            |
| 92 | Cer (d20:0/26:0(OH)) | C46 H93 N O4  | 21.87 | 86.66 | -2.04 | 724.7177 | 724.7167 | 706.7041, 688.6884, 312.3260, 294.3125, 60.0446                                                   |
| 93 | Cer (d22:0/25:0(OH)) | C47 H95 N O4  | 22.40 | 81.20 | -3.67 | 738.7334 | 738.7309 | 720.7174, 702.7103, 684.5929, 340.3558, 322.3416, 310.3420, 60.044                                |
| 94 | Cer (t14:0/14:0)     | C28 H57 N O4  | 9.32  | 97.85 | -1.34 | 472.4360 | 472.4356 | 454.3674, 436.3568, 208.2068, 60.0443                                                             |
| 95 | Cer (t18:0/16:0)     | C34 H69 N O4  | 12.48 | 96.83 | 2.11  | 556.5299 | 556.5288 | 538.5185, 520.5069, 318.2989, 300.2874, 282.2780, 264.2680, 252.2713, 60.0438                     |
| 96 | Cer (t18:0/16:1)     | C34 H67 N O4  | 12.66 | 74.58 | -1.17 | 554.5143 | 554.5137 | 536.5047, 518.4890, 318.3003, 300.2896, 282.2795, 264.2687, 252.2690, 60.0445                     |
| 97 | Cer (t18:0/17:0)     | C35 H71 N O4  | 13.11 | 73.70 | 1.17  | 570.5456 | 570.5451 | 552.5263, 534.5221, 318.3001, 300.2903, 282.2794, 264.2681, 252.2698, 60.0445                     |
| 98 | Cer (t18:0/17:1)     | C35 H69 N O4  | 13.20 | 72.43 | 1.82  | 568.5299 | 568.5300 | 550.5195, 532.5077, 514.4987, 502.4990, 318.2974, 300.2925, 282.2794, 264.2682, 252.2678, 60.0444 |
| 99 | Cer (t18:0/18:0)     | C36 H73 N O4  | 13.75 | 98.04 | -0.38 | 584.5612 | 584.5611 | 566.5493, 548.5379, 530.5316, 518.5301, 318.3004, 300.2895, 282.2794, 264.2686, 252.2691, 60.0445 |

|            |                         |                     |              |              |              |                 |                 |                                                                                                   |
|------------|-------------------------|---------------------|--------------|--------------|--------------|-----------------|-----------------|---------------------------------------------------------------------------------------------------|
| 100        | Cer (t18:0/18:1)        | C36 H71 N O4        | 13.94        | 80.22        | 0.11         | 582.5456        | 582.5456        | 564.5340, 546.5215, 528.5087, 318.3002, 300.2893, 282.2791, 264.2685, 252.2687, 60.0444           |
| 101        | Cer (t18:0/18:2)        | C36 H69 N O4        | 12.15        | 96.38        | 2.16         | 580.5299        | 580.5287        | 562.5163, 544.5061, 526.4970, 318.2994, 300.2886, 282.2788, 264.2679, 252.2683, 60.0439           |
| <b>102</b> | <b>Cer (t18:0/19:1)</b> | <b>C37 H73 N O4</b> | <b>14.46</b> | <b>72.71</b> | <b>-1.24</b> | <b>596.5612</b> | <b>596.5607</b> | <b>578.5343, 560.5363, 542.4854, 318.3007, 300.2921, 282.2795, 264.2686, 252.2690, 60.0446</b>    |
| 103        | Cer (t18:0/20:0)        | C38 H77 N O4        | 15.10        | 95.07        | -0.50        | 612.5925        | 612.5923        | 594.5811, 576.5722, 558.5618, 318.3011, 300.2898, 282.2791, 264.2686, 252.2689, 60.0445           |
| 104        | Cer (t18:0/20:1)        | C38 H75 N O4        | 15.10        | 80.53        | -3.03        | 610.5769        | 610.5751        | 592.5672, 574.5573, 318.2991, 300.2888, 282.2785, 264.2679, 252.2692, 60.0438                     |
| 105        | Cer (t18:0/21:0)        | C39 H79 N O4        | 15.77        | 95.31        | -1.10        | 626.6082        | 626.6077        | 608.5954, 590.5868, 572.5736, 560.5743, 318.3002, 300.2892, 282.2791, 264.2684, 252.2689, 60.0444 |
| <b>106</b> | <b>Cer (t18:0/21:1)</b> | <b>C39 H77 N O4</b> | <b>15.70</b> | <b>75.08</b> | <b>-1.99</b> | <b>624.5925</b> | <b>624.5938</b> | <b>606.5831, 588.5529, 570.4213, 318.3005, 300.2898, 282.2793, 264.2687, 252.2690, 60.0445</b>    |
| 107        | Cer (t18:0/22:0)        | C40 H81 N O4        | 16.43        | 99.02        | 0.03         | 640.6238        | 640.6238        | 622.6119, 604.6010, 586.5907, 574.5893, 318.3004, 300.2897, 282.2795, 264.2687, 252.2691, 60.0445 |
| 108        | Cer (t18:0/22:1)        | C40 H79 N O4        | 16.30        | 87.99        | 0.88         | 638.6082        | 638.6060        | 620.5993, 602.5904, 318.3001, 300.2894, 282.2794, 264.2686, 252.2690, 60.0445                     |
| 109        | Cer (t18:0/23:0)        | C41 H83 N O4        | 17.25        | 98.64        | -0.15        | 654.6395        | 654.6395        | 636.6284, 618.6171, 600.6059, 318.3009, 300.2895, 282.2797, 264.2688, 252.2691, 60.0445           |
| 110        | Cer (t18:0/23:1)        | C41 H81 N O4        | 17.00        | 80.56        | 1.78         | 652.6238        | 652.6233        | 634.6136, 616.5993, 598.5534, 318.2992, 300.2883, 282.2796, 264.2685, 252.2680, 60.0439           |
| 111        | Cer (t18:0/24:0)        | C42 H85 N O4        | 17.85        | 98.59        | -0.31        | 668.6551        | 668.6549        | 650.6435, 632.6327, 614.6206, 602.6235, 318.3003, 300.2897,                                       |

|                             |                     |              |              |              |                 |                 |                                                                                                                    |                                       |
|-----------------------------|---------------------|--------------|--------------|--------------|-----------------|-----------------|--------------------------------------------------------------------------------------------------------------------|---------------------------------------|
|                             |                     |              |              |              |                 |                 |                                                                                                                    | 282.2796, 264.2688, 252.2688, 60.0445 |
| 112 Cer (t18:0/24:1)        | C42 H83 N O4        | 17.40        | 70.87        | 1.23         | 666.6395        | 666.6383        | 648.6237, 630.6147, 318.2999, 300.2893, 282.2791, 264.2683, 252.2688, 60.0444                                      |                                       |
| <b>113 Cer (t18:0/24:2)</b> | <b>C42 H81 N O4</b> | <b>15.68</b> | <b>90.97</b> | <b>2.65</b>  | <b>664.6238</b> | <b>664.6221</b> | <b>646.5980, 628.5949, 610.5137, 406.3669, 364.3572, 318.2947, 300.2905, 282.2787, 264.2682, 252.2680, 60.0438</b> |                                       |
| <b>114 Cer (t18:0/24:5)</b> | <b>C42 H75 N O4</b> | <b>16.05</b> | <b>80.65</b> | <b>-1.08</b> | <b>658.5769</b> | <b>658.5750</b> | <b>640.5572, 622.4898, 604.5243, 400.3674, 358.3593, 318.3116, 300.2900, 282.2790, 264.2683, 252.2692, 60.0438</b> |                                       |
| 115 Cer (t18:0/25:0)        | C43 H87 N O4        | 18.65        | 93.89        | -1.80        | 682.6708        | 682.6698        | 664.6592, 646.6489, 628.6402, 318.3007, 300.2895, 282.2792, 264.2688, 252.2687, 60.0445                            |                                       |
| 116 Cer (t18:0/26:0) isomer | C44 H89 N O4        | 18.77        | 96.22        | -2.20        | 696.6864        | 696.6850        | 678.6762, 660.6663, 642.6543, 630.6419, 318.2998, 300.2892, 282.2793, 264.2686, 252.2674, 60.0444                  |                                       |
| 117 Cer (t18:0/27:0) isomer | C45 H91 N O4        | 19.33        | 91.39        | 1.28         | 710.7021        | 710.7045        | 692.6832, 674.6883, 300.2912, 282.2786, 264.2683, 60.0444                                                          |                                       |
| 118 Cer (t18:0/26:0)        | C44 H89 N O4        | 19.48        | 96.19        | -2.22        | 696.6864        | 696.6850        | 678.6746, 660.6626, 318.3009, 300.2890, 282.2792, 264.2694, 252.2681, 60.0444                                      |                                       |
| 119 Cer (t18:0/27:0)        | C45 H91 N O4        | 20.35        | 86.91        | -3.12        | 710.7021        | 710.7004        | 692.6925, 674.6793, 656.6145, 318.3012, 300.2883, 282.2791, 264.2674, 60.0446                                      |                                       |
| 120 Cer (t18:0/25:1)        | C43 H85 N O4        | 18.28        | 80.66        | 1.88         | 680.6551        | 680.6541        | 662.6531, 644.6406, 318.2999, 300.2890, 282.2793, 264.2682, 252.2694, 60.0444                                      |                                       |
| 121 Cer (t18:0/26:1)        | C44 H87 N O4        | 18.58        | 76.77        | -4.31        | 694.6708        | 694.6677        | 676.6412, 658.6339, 640.6337, 318.2991, 300.2894, 282.2789, 264.2680, 252.2414, 60.0439                            |                                       |
| <b>122 Cer (t18:0/26:5)</b> | <b>C44 H79 N O4</b> | <b>16.05</b> | <b>61.51</b> | <b>7.15</b>  | <b>686.6082</b> | <b>686.6039</b> | <b>668.6074, 650.6051, 632.5979, 318.2995, 300.2918, 282.2780, 264.2683, 60.0438</b>                               |                                       |
| 123 Cer (t19:0/18:1)        | C37 H73 N O4        | 14.50        | 70.45        | 3.42         | 596.5612        | 596.5602        | 578.5495, 560.5412, 548.5348, 332.3153, 314.3049, 296.2946,                                                        |                                       |



|                                 |                     |              |              |              |                 |                 |                                                                                                             |                             |  |  |  |  |
|---------------------------------|---------------------|--------------|--------------|--------------|-----------------|-----------------|-------------------------------------------------------------------------------------------------------------|-----------------------------|--|--|--|--|
|                                 |                     |              |              |              |                 |                 |                                                                                                             | 278.2842, 266.2574, 60.0438 |  |  |  |  |
| 124 Cer (t19:0/18:2)            | C37 H71 N O4        | 13.60        | 72.83        | 1.21         | 594.5456        | 594.5451        | 576.5337, 558.5162, 332.3162, 314.3056, 296.2948, 278.2834, 266.2282, 60.0440                               |                             |  |  |  |  |
| 125 Cer (t20:0/26:0)            | C46 H93 N O4        | 21.24        | 96.16        | -2.32        | 724.7177        | 724.7161        | 706.7055, 688.6957, 346.3329, 328.3209, 310.3114, 292.2996, 280.2978, 60.0444                               |                             |  |  |  |  |
| <b>126 Cer (t20:0/26:1)</b>     | <b>C46 H91 N O4</b> | <b>20.72</b> | <b>63.46</b> | <b>-1.85</b> | <b>722.7021</b> | <b>722.7009</b> | <b>704.7011, 686.6849, 346.3299, 328.3222, 310.3095, 292.2997, 280.3009, 60.0445</b>                        |                             |  |  |  |  |
| 127 Cer (t20:0/30:1)            | C50 H99 N O4        | 22.40        | 83.42        | -3.29        | 778.7647        | 778.7627        | 760.7500, 742.7370, 310.3111, 292.2998, 280.2998, 60.0445                                                   |                             |  |  |  |  |
| 128 Cer (t20:0/31:1)            | C51 H101 N O4       | 23.27        | 75.18        | -4.77        | 792.7803        | 792.7782        | 774.7702, 756.7553, 738.7353, 310.3082, 292.2988, 280.3001, 60.0444                                         |                             |  |  |  |  |
| 129 Cer (t22:0/25:0)            | C47 H95 N O4        | 21.90        | 94.15        | -2.71        | 738.7334        | 738.7316        | 720.7216, 702.7125, 374.3682, 356.3524, 338.3409, 320.3314, 308.3336, 60.0444                               |                             |  |  |  |  |
| 130 Cer (t22:0/26:0)            | C48 H97 N O4        | 22.44        | 95.47        | -2.37        | 752.749         | 752.7474        | 734.7371, 716.7219, 698.7067, 374.3607, 356.3535, 338.3418, 320.3323, 308.3328, 60.0445                     |                             |  |  |  |  |
| <b>131 Cer (t22:0/26:1)</b>     | <b>C48 H95 N O4</b> | <b>22.47</b> | <b>61.42</b> | <b>0.05</b>  | <b>750.7334</b> | <b>750.7345</b> | <b>732.7208, 714.7138, 374.3637, 356.3513, 338.3410, 320.3314, 308.3287, 60.0444</b>                        |                             |  |  |  |  |
| 132 Cer (t22:0/27:0)            | C49 H99 N O4        | 22.92        | 93.63        | -2.63        | 766.7647        | 766.7630        | 748.7530, 730.7428, 374.3635, 356.3529, 338.3420, 320.3311, 308.3214, 60.0443                               |                             |  |  |  |  |
| 133 Cer (t22:0/28:0)            | C50 H101 N O4       | 23.50        | 95.82        | -1.75        | 780.7803        | 780.7786        | 762.7694, 744.7563, 726.7574, 374.3592, 356.3517, 338.3406, 320.3308, 308.3273, 60.0445                     |                             |  |  |  |  |
| <b>134 Cer (t16:0/12:0(OH))</b> | <b>C28 H57 N O5</b> | <b>7.67</b>  | <b>80.92</b> | <b>-5.28</b> | <b>488.4310</b> | <b>488.4285</b> | <b>470.3743, 236.2407, 60.0443</b>                                                                          |                             |  |  |  |  |
| 135 Cer (t18:0/16:0(OH))        | C34 H69 N O5        | 12.05        | 91.03        | -2.65        | 572.5249        | 572.5237        | 554.4728, 542.4728, 536.5024, 518.4919, 500.4885, 318.2993, 300.2893, 282.2792, 264.2683, 252.2691, 60.0440 |                             |  |  |  |  |
| <b>136 Cer (t18:0/17:0(OH))</b> | <b>C35 H71 N O5</b> | <b>12.61</b> | <b>65.94</b> | <b>3.03</b>  | <b>586.5405</b> | <b>586.5392</b> | <b>568.5296, 550.5165, 532.5129, 318.2998, 300.2871, 282.2783,</b>                                          |                             |  |  |  |  |

|                                 |                     |              |              |              |                 |                 |                                                                                                                | <b>264.2678, 60.0438</b> |  |  |  |  |
|---------------------------------|---------------------|--------------|--------------|--------------|-----------------|-----------------|----------------------------------------------------------------------------------------------------------------|--------------------------|--|--|--|--|
| <b>137 Cer (t18:0/17:4(OH))</b> | <b>C35 H63 N O5</b> | <b>10.20</b> | <b>85.77</b> | <b>-0.49</b> | <b>578.4779</b> | <b>578.4774</b> | <b>560.4748, 300.2878, 282.2789, 264.2681, 252.2725, 60.0444</b>                                               |                          |  |  |  |  |
| 138 Cer (t18:0/18:0(OH))        | C36 H63 N O5        | 13.20        | 96.03        | -0.08        | 600.5562        | 600.5565        | 582.5444, 564.5341, 546.5231, 528.5074, 318.2988, 300.2889,<br>282.2786, 264.2679, 252.2680, 60.0438           |                          |  |  |  |  |
| 139 Cer (t18:0/20:0(OH))        | C38 H77 N O5        | 14.50        | 82.50        | -3.27        | 628.5875        | 628.5857        | 610.5772, 592.5657, 574.5547, 318.2995, 300.2892, 282.2792,<br>264.2683, 252.2689, 60.0444                     |                          |  |  |  |  |
| 140 Cer (t18:0/21:0(OH))        | C39 H79 N O5        | 15.15        | 93.93        | 0.48         | 642.6031        | 642.6031        | 624.5913, 606.5805, 588.5660, 570.4251, 318.3165, 300.2898,<br>282.2783, 264.2678, 252.2670, 60.0438           |                          |  |  |  |  |
| 141 Cer (t18:0/22:0(OH))        | C40 H81 N O5        | 15.80        | 99.55        | -0.17        | 656.6188        | 656.6186        | 638.6073, 620.5966, 602.5860, 584.5751, 318.3005, 300.2900,<br>282.2798, 264.2691, 252.2691, 60.0445           |                          |  |  |  |  |
| 142 Cer (t18:0/23:0(OH))        | C41 H83 N O5        | 16.45        | 99.00        | 0.13         | 670.6344        | 670.6345        | 652.6223, 634.6119, 616.6004, 604.5986, 598.5930, 318.3001,<br>300.2897, 282.2796, 264.2688, 252.2690, 60.0445 |                          |  |  |  |  |
| 143 Cer (t18:0/23:1(OH))        | C41 H81 N O5        | 15.32        | 94.48        | -0.67        | 668.6188        | 668.6185        | 650.6076, 632.5961, 614.5852, 596.5374, 318.3008, 300.2895,<br>282.2794, 264.2685, 252.2694, 60.0444           |                          |  |  |  |  |
| 144 Cer (t18:0/24:0(OH))        | C42 H85 N O5        | 17.13        | 98.90        | -0.24        | 684.6501        | 684.6497        | 666.6391, 648.6288, 630.6174, 612.6071, 318.3006, 300.2902,<br>282.2798, 264.2692, 252.2693, 60.0445           |                          |  |  |  |  |
| 145 Cer (t18:0/24:1(OH))        | C42 H83 N O5        | 16.02        | 97.11        | -1.56        | 682.6344        | 682.6333        | 664.6214, 646.6117, 628.6013, 610.5933, 318.3001, 300.2894,<br>282.2796, 264.2688, 252.2686, 60.0445           |                          |  |  |  |  |
| 146 Cer (t18:0/25:0(OH))        | C43 H87 N O5        | 17.83        | 98.68        | -0.38        | 698.6657        | 698.6653        | 680.6533, 662.6426, 644.6315, 626.6226, 614.6232, 318.3002,<br>300.2894, 282.2795, 264.2686, 252.2687, 60.0444 |                          |  |  |  |  |
| 147 Cer (t18:0/26:0(OH))        | C44 H89 N O5        | 18.58        | 95.18        | -1.79        | 712.6814        | 712.6802        | 694.6694, 676.6593, 658.6466, 640.6314, 318.3008, 300.2892,<br>282.2794, 264.2685, 252.2697, 60.0444           |                          |  |  |  |  |
| 148 Cer (d14:1/16:0)            | C30 H59 N O3        | 11.00        | 85.53        | -2.51        | 482.4568        | 482.4561        | 226.2164, 208.2064, 196.2068, 60.0444                                                                          |                          |  |  |  |  |

|                             |                     |              |              |              |                 |                 |                                                                               |
|-----------------------------|---------------------|--------------|--------------|--------------|-----------------|-----------------|-------------------------------------------------------------------------------|
| 149 Cer (d14:1/18:0)        | C32 H63 N O3        | 12.10        | 70.12        | 3.25         | 510.4881        | 510.4866        | 244.1701, 226.2159, 208.2064, 196.2065, 60.0443                               |
| 150 Cer (d14:1/18:1)        | C32 H61 N O3        | 11.32        | 75.17        | -1.78        | 508.4724        | 508.4715        | 490.4637, 244.1489, 226.2164, 208.2065, 196.2068, 60.0443                     |
| <b>151 Cer (d14:1/18:2)</b> | <b>C32 H59 N O3</b> | <b>11.16</b> | <b>91.52</b> | <b>-2.46</b> | <b>506.4568</b> | <b>506.4553</b> | <b>488.4472, 470.6828, 226.2163, 208.2048, 196.2048, 60.0438</b>              |
| 152 Cer (d14:1/20:0)        | C34 H67 N O3        | 13.30        | 60.57        | 2.67         | 538.5194        | 538.5200        | 520.5080, 502.4976, 490.4968, 226.2163, 208.2055, 196.2052, 60.0445           |
| <b>153 Cer (d14:1/20:4)</b> | <b>C34 H59 N O3</b> | <b>11.68</b> | <b>79.05</b> | <b>2.68</b>  | <b>530.4568</b> | <b>530.4548</b> | <b>512.4422, 226.2152, 208.2064, 196.2070, 60.0442</b>                        |
| 154 Cer (d14:1/22:0)        | C36 H71 N O3        | 14.63        | 98.78        | 0.32         | 566.5507        | 566.5507        | 548.5370, 530.5258, 226.2165, 208.2067, 196.2065, 60.0445                     |
| 155 Cer (d14:1/23:0)        | C37 H73 N O3        | 15.30        | 97.85        | -0.99        | 580.5663        | 580.5664        | 562.5615, 544.5448, 226.2158, 208.2063, 196.2063, 60.0444                     |
| 156 Cer (d14:1/24:0)        | C38 H75 N O3        | 16.03        | 85.79        | 0.26         | 594.5820        | 594.5817        | 576.5717, 558.5551, 546.5523, 226.2164, 208.2067, 196.2065, 60.0445           |
| 157 Cer (d14:2/16:0)        | C30 H57 N O3        | 10.78        | 94.25        | 2.38         | 480.4411        | 480.4400        | 462.3710, 224.2009, 206.1906, 194.1890, 60.0445                               |
| <b>158 Cer (d14:2/18:2)</b> | <b>C32 H57 N O3</b> | <b>11.06</b> | <b>77.82</b> | <b>3.59</b>  | <b>504.4411</b> | <b>504.4390</b> | <b>242.1975, 224.1959, 206.1905, 194.1914, 60.0443</b>                        |
| <b>159 Cer (d14:2/20:4)</b> | <b>C34 H57 N O3</b> | <b>10.96</b> | <b>85.99</b> | <b>3.65</b>  | <b>528.4411</b> | <b>528.4393</b> | <b>510.4281, 224.2026, 206.1893, 60.0438</b>                                  |
| <b>160 Cer (d14:2/20:5)</b> | <b>C34 H55 N O3</b> | <b>10.48</b> | <b>86.16</b> | <b>4.11</b>  | <b>526.4255</b> | <b>526.4235</b> | <b>508.4086, 206.1894, 60.0437</b>                                            |
| <b>161 Cer (d14:2/20:6)</b> | <b>C34 H53 N O3</b> | <b>10.13</b> | <b>80.80</b> | <b>3.88</b>  | <b>524.4098</b> | <b>524.4069</b> | <b>506.3812, 224.2058, 206.1891, 60.0437</b>                                  |
| <b>162 Cer (d14:2/24:3)</b> | <b>C38 H67 N O3</b> | <b>14.15</b> | <b>88.75</b> | <b>-3.97</b> | <b>586.5194</b> | <b>586.5169</b> | <b>568.5049, 538.4920, 224.2005, 206.1909, 194.1884, 60.0444</b>              |
| <b>163 Cer (d14:2/25:3)</b> | <b>C39 H69 N O3</b> | <b>14.82</b> | <b>80.84</b> | <b>-4.03</b> | <b>600.5350</b> | <b>600.5324</b> | <b>582.5183, 552.5139, 224.2065, 206.1907, 194.1917, 60.0444</b>              |
| <b>164 Cer (d14:2/26:3)</b> | <b>C40 H71 N O3</b> | <b>15.53</b> | <b>88.32</b> | <b>-3.66</b> | <b>614.5507</b> | <b>614.5484</b> | <b>596.5388, 566.5217, 224.2010, 206.1905, 194.1142, 60.0444</b>              |
| 165 Cer (d15:1/20:0)        | C35 H69 N O3        | 13.88        | 73.53        | -0.17        | 552.5350        | 552.5341        | 534.5190, 504.5190, 240.2322, 222.2219, 210.2216, 60.0444                     |
| 166 Cer (d15:1/22:0)        | C37 H73 N O3        | 15.08        | 87.15        | -0.67        | 580.5663        | 580.5656        | 562.5619, 544.5423, 240.2324, 222.2221, 210.2222, 60.0444                     |
| <b>167 Cer (d15:1/22:1)</b> | <b>C37 H71 N O3</b> | <b>14.68</b> | <b>75.69</b> | <b>-1.61</b> | <b>578.5507</b> | <b>578.5499</b> | <b>560.5363, 542.5317, 530.5252, 240.2324, 222.2220, 210.2218, 60.0444</b>    |
| <b>168 Cer (d15:2/22:1)</b> | <b>C37 H69 N O3</b> | <b>14.00</b> | <b>69.76</b> | <b>-1.63</b> | <b>576.5350</b> | <b>576.5342</b> | <b>558.5212, 238.2157, 220.2064, 208.2057, 60.0444</b>                        |
| 169 Cer (d16:1/22:0)        | C38 H75 N O3        | 15.83        | 93.75        | 0.01         | 594.5820        | 594.5818        | 576.5789, 558.5592, 546.5678, 272.2603, 254.2479, 236.2373, 224.2377, 60.0444 |

|                             |                     |              |              |             |                 |                 |                                                                               |
|-----------------------------|---------------------|--------------|--------------|-------------|-----------------|-----------------|-------------------------------------------------------------------------------|
| 170 Cer (d16:1/22:1)        | C38 H73 N O3        | 15.21        | 80.88        | 2.30        | 592.5663        | 592.5669        | 574.5528, 556.5449, 254.2283, 236.2364, 224.2380, 60.0438                     |
| <b>171 Cer (d16:1/22:2)</b> | <b>C38 H71 N O3</b> | <b>15.07</b> | <b>62.36</b> | <b>0.33</b> | <b>590.5507</b> | <b>590.5485</b> | <b>572.5410, 272.2396, 254.2482, 236.2374, 224.2377, 60.0444</b>              |
| 172 Cer (d16:1/24:0)        | C40 H79 N O3        | 17.21        | 93.81        | 0.54        | 622.6133        | 622.6125        | 604.6023, 586.5933, 574.5919, 254.2468, 236.2370, 224.2236, 60.0439           |
| <b>173 Cer (d16:2/22:2)</b> | <b>C38 H69 N O3</b> | <b>14.61</b> | <b>77.60</b> | <b>4.60</b> | <b>588.5350</b> | <b>588.5335</b> | <b>570.5212, 252.2318, 234.2216, 222.2207, 60.0439</b>                        |
| <b>174 Cer (d16:2/23:1)</b> | <b>C39 H73 N O3</b> | <b>15.53</b> | <b>80.53</b> | <b>3.43</b> | <b>604.5663</b> | <b>604.5646</b> | <b>586.5535, 568.5508, 252.2267, 234.2215, 222.2207, 60.0438</b>              |
| <b>175 Cer (d16:2/23:2)</b> | <b>C39 H71 N O3</b> | <b>15.28</b> | <b>86.09</b> | <b>3.94</b> | <b>602.5507</b> | <b>602.5485</b> | <b>584.5293, 252.2321, 234.2216, 222.2217, 60.0444</b>                        |
| <b>176 Cer (d16:2/24:2)</b> | <b>C40 H73 N O3</b> | <b>16.05</b> | <b>75.32</b> | <b>3.60</b> | <b>616.5663</b> | <b>616.5644</b> | <b>598.5288, 252.2318, 234.2220, 222.2215, 60.0445</b>                        |
| 177 Cer (d18:1/14:1)        | C32 H61 N O3        | 11.56        | 88.80        | -3.29       | 508.4724        | 508.4722        | 300.2695, 282.2791, 264.2684, 252.2678, 60.0443                               |
| 178 Cer (d18:1/16:0)        | C34 H67 N O3        | 13.20        | 92.16        | 2.67        | 538.5194        | 538.5200        | 520.5080, 502.4976, 490.4968, 300.2920, 282.2788, 264.2682, 252.2681, 60.0438 |
| 179 Cer (d18:1/16:1)        | C34 H65 N O3        | 12.70        | 94.00        | -0.28       | 536.5037        | 536.5037        | 518.4883, 500.4830, 488.4807, 300.2890, 282.2789, 264.2688, 252.2689, 60.0444 |
| 180 Cer (d18:1/17:0)        | C35 H69 N O3        | 13.80        | 80.51        | -0.37       | 552.5350        | 552.5345        | 534.5235, 516.5156, 504.5099, 282.2786, 264.2680, 252.2697, 60.0438           |
| 181 Cer (d18:1/17:1)        | C35 H67 N O3        | 13.35        | 94.17        | 0.45        | 550.5194        | 550.5194        | 532.5075, 520.5060, 514.4981, 300.2866, 282.2784, 264.2683, 60.0439           |
| 182 Cer (d18:1/18:0)        | C36 H71 N O3        | 14.46        | 98.8         | -1.01       | 566.5507        | 566.5512        | 548.5392, 530.5392, 300.2905, 282.2787, 264.2683, 252.2691, 60.0437           |
| 183 Cer (d18:1/18:1)        | C36 H69 N O3        | 13.95        | 90.93        | -0.81       | 564.5350        | 564.5355        | 546.5240, 528.5261, 300.2706, 282.2789, 264.2685, 252.2689, 60.0444           |
| 184 Cer (d18:1/18:2)        | C36 H67 N O3        | 13.50        | 99.22        | -0.60       | 562.5194        | 562.5197        | 544.5092, 526.4973, 282.2799, 264.2687, 252.2134, 60.0445                     |
| 185 Cer (d18:1/20:0)        | C38 H75 N O3        | 15.84        | 94.73        | -0.43       | 594.5820        | 594.5823        | 576.5726, 558.5505, 300.2866, 282.2785, 264.2683, 252.2677, 60.0445           |
| 186 Cer (d18:1/20:1)        | C38 H73 N O3        | 15.23        | 75.43        | -0.45       | 592.5663        | 592.5668        | 574.5589, 556.5482, 300.2693, 282.2785, 264.2677, 252.2622, 60.0438           |
| 187 Cer (d18:1/21:0)        | C39 H77 N O3        | 16.55        | 72.25        | 1.68        | 608.5976        | 608.5974        | 590.5844, 572.5753, 300.2740, 282.2788, 264.2683, 252.2695, 60.0433           |
| 188 Cer (d18:1/22:0)        | C40 H79 N O3        | 17.25        | 65.73        | 0.12        | 622.6133        | 622.6122        | 604.5901, 586.5897, 574.5606, 300.2874, 282.2793, 264.2685, 252.2692, 60.0443 |
| 189 Cer (d18:1/22:1)        | C40 H77 N O3        | 16.53        | 75.34        | -3.54       | 620.5976        | 620.5969        | 602.5862, 584.5745, 300.2867, 282.2782, 264.2676, 252.2681, 60.0438           |

|            |                                |                     |              |              |              |                 |                 |                                                                               |
|------------|--------------------------------|---------------------|--------------|--------------|--------------|-----------------|-----------------|-------------------------------------------------------------------------------|
| 190        | Cer (d18:1/22:2)               | C40 H75 N O3        | 16.32        | 61.25        | -3.06        | 618.5820        | 618.5790        | 600.5703, 582.5579, 300.2832, 282.2801, 264.2685, 252.2690, 60.0444           |
| 191        | Cer (d18:1/23:0)               | C41 H81 N O3        | 17.95        | 68.37        | -1.02        | 636.6289        | 636.6282        | 618.6271, 600.6136, 588.6035, 300.2935, 282.2794, 264.2686, 252.2680, 60.0445 |
| 192        | Cer (d18:1/23:1)               | C41 H79 N O3        | 17.02        | 66.13        | 0.08         | 634.6133        | 634.6129        | 616.5984, 598.5948, 300.2891, 282.2786, 264.2688, 252.2680, 60.0444           |
| <b>193</b> | <b>Cer (d18:1/23:5)</b>        | <b>C41 H71 N O3</b> | <b>13.00</b> | <b>75.79</b> | <b>-3.03</b> | <b>626.5507</b> | <b>626.5537</b> | <b>608.5416, 590.5322, 300.2876, 282.2781, 264.2680, 252.2646, 60.0438</b>    |
| 194        | Cer (d18:1/24:0)               | C42 H83 N O3        | 18.68        | 70.23        | -0.73        | 650.6446        | 650.6431        | 632.6388, 614.6308, 602.6239, 300.2876, 282.2794, 264.2686, 252.2689, 60.0444 |
| 195        | Cer (d18:1/24:1)               | C42 H81 N O3        | 17.81        | 64.02        | 1.52         | 648.6289        | 648.6287        | 630.6203, 612.6077, 600.6053, 300.2895, 282.2793, 264.2688, 252.2689, 60.0444 |
| 196        | Cer (d18:1/24:2)               | C42 H79 N O3        | 17.59        | 70.45        | -2.54        | 646.6133        | 646.6106        | 628.6036, 610.5821, 282.2786, 264.2679, 252.2686, 60.0439                     |
| 197        | Cer (d18:1/24:5)               | C42 H73 N O3        | 13.60        | 83.53        | -2.66        | 640.5663        | 640.5683        | 622.5577, 604.5419, 300.2869, 282.2816, 264.2679, 252.2646, 60.0438           |
| 198        | Cer (d18:1/25:0)               | C43 H85 N O3        | 19.50        | 72.04        | -0.01        | 664.6602        | 664.6593        | 646.6523, 300.2867, 282.2787, 264.2681, 252.2657, 60.0435                     |
| 199        | Cer (d18:1/25:1)               | C43 H83 N O3        | 18.60        | 63.55        | -3.53        | 662.6446        | 662.6426        | 644.6228, 300.2881, 282.2784, 264.2683, 252.2673, 60.0444                     |
| <b>200</b> | <b>Cer (d18:1/25:2)</b>        | <b>C43 H81 N O3</b> | <b>18.41</b> | <b>61.26</b> | <b>1.29</b>  | <b>660.6289</b> | <b>660.6258</b> | <b>300.2914, 282.2794, 264.2686, 252.2697, 60.0445</b>                        |
| <b>201</b> | <b>Cer (d18:1/25:4)</b>        | <b>C43 H77 N O3</b> | <b>13.64</b> | <b>70.95</b> | <b>5.11</b>  | <b>656.5976</b> | <b>656.5949</b> | <b>638.5964, 620.5934, 300.2920, 282.2783, 264.2673, 252.2687, 60.0437</b>    |
| 202        | Cer (d18:1/26:0)               | C44 H87 N O3        | 20.40        | 77.01        | 1.09         | 678.6759        | 678.6747        | 660.6770, 300.2862, 282.2806, 264.2682, 252.2684, 60.0444                     |
| 203        | Cer (d18:1/26:1)               | C44 H85 N O3        | 19.23        | 69.78        | 2.34         | 676.6602        | 676.6574        | 658.6508, 640.6382, 282.2785, 264.2684, 60.0483                               |
| <b>204</b> | <b>Cer (d18:1/26:4)</b>        | <b>C44 H77 N O3</b> | <b>14.35</b> | <b>94.37</b> | <b>2.07</b>  | <b>668.5976</b> | <b>668.5991</b> | <b>650.5900, 300.2882, 282.2813, 264.2679, 60.0437</b>                        |
| <b>205</b> | <b>Cer (d18:1/26:4) isomer</b> | <b>C44 H77 N O3</b> | <b>13.20</b> | <b>77.90</b> | <b>0.99</b>  | <b>668.5976</b> | <b>668.5989</b> | <b>650.5833, 632.5784, 300.2890, 282.2784, 264.2678, 252.2683, 60.0438</b>    |
| <b>206</b> | <b>Cer (d18:1/27:5)</b>        | <b>C45 H79 N O3</b> | <b>15.10</b> | <b>70.79</b> | <b>-5.50</b> | <b>682.6133</b> | <b>682.6174</b> | <b>664.6041, 646.5940, 300.2891, 282.2779, 264.2679, 252.2679, 60.0438</b>    |
| 207        | Cer (d18:1/28:4)               | C46 H83 N O3        | 15.40        | 70.34        | -4.32        | 698.6446        | 698.6412        | 300.2862, 282.2787, 264.2677, 60.0439                                         |
| <b>208</b> | <b>Cer (d18:1/28:5)</b>        | <b>C46 H81 N O3</b> | <b>15.60</b> | <b>71.59</b> | <b>-3.93</b> | <b>696.6289</b> | <b>696.6324</b> | <b>678.6159, 660.6082, 300.2740, 282.2785, 264.2679, 252.2684, 60.0438</b>    |
| <b>209</b> | <b>Cer (d18:1/29:5)</b>        | <b>C47 H83 N O3</b> | <b>16.20</b> | <b>77.15</b> | <b>-3.69</b> | <b>710.6446</b> | <b>710.6476</b> | <b>692.6337, 674.6262, 300.2887, 282.2789, 264.2679, 252.2682, 60.0439</b>    |

|                             |                     |              |              |              |                 |                 |                                                                               |
|-----------------------------|---------------------|--------------|--------------|--------------|-----------------|-----------------|-------------------------------------------------------------------------------|
| <b>210 Cer (d18:1/32:4)</b> | <b>C50 H91 N O3</b> | <b>17.70</b> | <b>61.11</b> | <b>-1.99</b> | <b>754.7072</b> | <b>754.7036</b> | <b>736.6524, 718.6279, 282.2788, 264.2689, 60.0436</b>                        |
| 211 Cer (d18:1/32:5)        | C50 H89 N O3        | 17.65        | 76.56        | -2.45        | 752.6915        | 752.6944        | 734.6812, 716.6725, 300.2906, 282.2783, 264.2678, 252.2644, 60.0437           |
| 212 Cer (d19:1/24:0)        | C43 H85 N O3        | 19.58        | 76.42        | 1.15         | 664.6602        | 664.6588        | 646.6520, 296.3310, 278.2849, 266.2833, 60.0436                               |
| 213 Cer (d19:2/16:0)        | C35 H67 N O3        | 13.03        | 98.78        | -0.26        | 550.5194        | 550.5194        | 532.5097, 514.4927, 502.4931, 312.2890, 294.2785, 276.2685, 264.2688, 60.0445 |
| <b>214 Cer (d19:2/16:1)</b> | <b>C35 H65 N O3</b> | <b>12.93</b> | <b>96.12</b> | <b>-0.77</b> | <b>548.5037</b> | <b>548.5042</b> | <b>312.2895, 294.2790, 276.2687, 264.2683, 60.0444</b>                        |
| <b>215 Cer (d19:2/16:2)</b> | <b>C35 H63 N O3</b> | <b>10.70</b> | <b>78.16</b> | <b>-5.54</b> | <b>546.4881</b> | <b>546.4856</b> | <b>528.4767, 510.4620, 498.4630, 294.2815, 276.2684, 264.2674, 60.0445</b>    |
| 216 Cer (d19:2/18:2)        | C37 H67 N O3        | 13.60        | 60.45        | -5.37        | 574.5194        | 574.5164        | 294.2772, 276.2690, 264.2683                                                  |
| <b>217 Cer (d19:2/18:3)</b> | <b>C37 H65 N O3</b> | <b>13.42</b> | <b>72.89</b> | <b>2.89</b>  | <b>572.5037</b> | <b>572.5013</b> | <b>554.4765, 312.2939, 294.2777, 276.2684, 264.2683, 60.0444</b>              |
| <b>218 Cer (d19:2/18:4)</b> | <b>C37 H63 N O3</b> | <b>12.23</b> | <b>63.95</b> | <b>6.10</b>  | <b>570.4881</b> | <b>570.4846</b> | <b>552.4873, 534.4846, 312.2876, 294.2788, 276.2674, 264.2675, 60.0438</b>    |
| 219 Cer (d19:2/20:0)        | C39 H75 N O3        | 15.83        | 70.56        | -3.24        | 606.5820        | 606.5815        | 588.5678, 570.5591, 294.2788, 276.2676, 264.2673, 60.0438                     |
| <b>220 Cer (d19:2/20:4)</b> | <b>C39 H67 N O5</b> | <b>13.35</b> | <b>90.84</b> | <b>3.17</b>  | <b>598.5194</b> | <b>598.5176</b> | <b>580.5193, 562.5156, 312.3244, 294.2816, 276.2678, 264.2680, 60.0439</b>    |
| <b>221 Cer (d19:2/21:5)</b> | <b>C40 H67 N O3</b> | <b>12.36</b> | <b>71.01</b> | <b>-6.14</b> | <b>610.5194</b> | <b>610.5235</b> | <b>592.5112, 574.5010, 294.2754, 276.2675, 264.2670, 60.0438</b>              |
| <b>222 Cer (d19:2/22:1)</b> | <b>C41 H77 N O3</b> | <b>16.83</b> | <b>60.44</b> | <b>-0.83</b> | <b>632.5976</b> | <b>632.5950</b> | <b>614.5356, 294.2783, 276.2680, 264.2694, 60.0443</b>                        |
| <b>223 Cer (d19:2/24:1)</b> | <b>C43 H81 N O3</b> | <b>17.85</b> | <b>66.77</b> | <b>-2.57</b> | <b>660.6267</b> | <b>660.6268</b> | <b>642.6215, 624.5982, 612.6075, 294.2784, 276.2682, 264.2677, 60.0444</b>    |
| <b>224 Cer (d19:2/24:2)</b> | <b>C43 H79 N O3</b> | <b>18.00</b> | <b>61.37</b> | <b>2.94</b>  | <b>658.6133</b> | <b>658.6100</b> | <b>640.6160, 294.2813, 276.2669, 264.2683, 60.0438</b>                        |
| <b>225 Cer (d19:3/17:4)</b> | <b>C36 H59 N O3</b> | <b>11.28</b> | <b>70.54</b> | <b>2.13</b>  | <b>554.4568</b> | <b>554.4541</b> | <b>536.4232, 292.2621, 274.2524, 262.2497, 60.0438</b>                        |
| 226 Cer (d20:1/24:1)        | C44 H85 N O3        | 19.54        | 80.43        | -2.35        | 676.6602        | 676.6584        | 658.6530, 310.3071, 292.2995, 280.3015, 60.0438                               |
| 227 Cer (d20:1/25:0)        | C45 H89 N O3        | 21.30        | 65.70        | -1.52        | 692.6915        | 692.6894        | 310.3110, 292.2997, 280.2976, 60.0443                                         |
| 228 Cer (d20:1/26:0)        | C46 H91 N O3        | 22.00        | 63.42        | 1.16         | 706.7072        | 706.7055        | 688.7034, 670.6835, 328.3253, 310.3105, 292.2999, 280.2994, 60.0444           |
| <b>229 Cer (d20:1/26:2)</b> | <b>C46 H87 N O3</b> | <b>21.17</b> | <b>60.14</b> | <b>-3.86</b> | <b>702.6759</b> | <b>702.6720</b> | <b>684.6607, 328.3002, 310.3127, 292.2998, 280.2994, 60.0445</b>              |
| 230 Cer (d20:1/27:0)        | C47 H93 N O3        | 22.60        | 64.89        | -0.93        | 720.7228        | 720.7207        | 702.7083, 684.7016, 310.3095, 292.2998, 280.3012, 60.0444                     |
| <b>231 Cer (d20:2/28:0)</b> | <b>C48 H93 N O3</b> | <b>21.24</b> | <b>83.22</b> | <b>-4.72</b> | <b>732.7228</b> | <b>732.7198</b> | <b>714.7022, 326.3055, 308.2946, 290.2848, 278.2872, 60.0445</b>              |

|                                 |                     |                          |                          |                                                                                                          |
|---------------------------------|---------------------|--------------------------|--------------------------|----------------------------------------------------------------------------------------------------------|
| <b>232 Cer (d21:1/28:0)</b>     | <b>C49 H97 N O3</b> | <b>23.42 68.25 -1.47</b> | <b>748.7541 748.7518</b> | <b>730.6799, 324.3259, 306.3160, 294.3166, 60.0442</b>                                                   |
| <b>233 Cer (d22:1/26:2)</b>     | <b>C48 H91 N O3</b> | <b>22.42 74.07 -4.33</b> | <b>730.7072 730.7034</b> | <b>712.7041, 356.3303, 338.3414, 320.3307, 308.3314, 60.0442</b>                                         |
| 234 Cer (d22:1/26:0)            | C48 H95 N O3        | 22.99 62.45 1.73         | 734.7385 734.7370        | 716.7297, 698.7081, 338.3418, 320.3309, 308.3295, 60.0445                                                |
| <b>235 Cer (d22:1/27:2)</b>     | <b>C49 H93 N O3</b> | <b>22.89 71.79 -5.40</b> | <b>744.7228 744.7184</b> | <b>726.6413, 320.3312, 308.3324, 60.0445</b>                                                             |
| 236 Cer (d22:1/28:0)            | C50 H99 N O3        | 23.85 78.70 -0.61        | 762.7698 762.7679        | 744.7567, 726.7396, 338.3407, 320.3318, 308.3309, 60.0444                                                |
| <b>237 Cer (d14:1/18:3(OH))</b> | <b>C32 H57 N O4</b> | <b>13.62 97.64 -0.54</b> | <b>520.4360 520.4354</b> | <b>226.2176, 208.2065, 196.2062, 60.0445</b>                                                             |
| <b>238 Cer (d14:2/14:3(OH))</b> | <b>C28 H47 N O4</b> | <b>9.03 89.60 -1.61</b>  | <b>462.3578 462.3571</b> | <b>444.3234, 206.1909, 60.0432</b>                                                                       |
| 239 Cer (d18:1/24:0(OH))        | C42 H83 N O4        | 17.98 86.98 0.55         | 666.6395 666.6397        | 648.6270, 630.6195, 300.2887, 282.2787, 264.2681, 252.2683, 60.0439                                      |
| <b>240 Cer (d18:1/26:2(OH))</b> | <b>C44 H83 N O4</b> | <b>18.55 87.88 -3.14</b> | <b>690.6395 690.6376</b> | <b>672.6232, 300.2876, 282.2766, 264.2685, 252.2686, 60.0444</b>                                         |
| 241 Cer (d19:2/16:1(OH))        | C35 H65 N O4        | 11.98 99.09 -0.05        | 564.4986 564.4986        | 546.4859, 528.4769, 510.4669, 498.4673, 312.2901, 294.2786, 276.2685, 264.2686, 60.0445                  |
| <b>242 Cer (d19:2/25:2(OH))</b> | <b>C44 H81 N O4</b> | <b>17.90 68.92 -0.54</b> | <b>688.6238 688.6235</b> | <b>670.6204, 294.2822, 276.2681, 264.2685, 60.0444</b>                                                   |
| <b>243 Cer (d19:3/16:1(OH))</b> | <b>C35 H63 N O4</b> | <b>10.27 86.35 -1.54</b> | <b>562.4830 562.4823</b> | <b>544.4573, 526.4616, 514.4674, 310.2741, 292.2638, 274.2525, 262.2538, 60.0443</b>                     |
| <b>244 Cer (d20:1/26:2(OH))</b> | <b>C46 H87 N O4</b> | <b>19.50 74.11 -5.66</b> | <b>718.6708 718.6666</b> | <b>700.6493, 328.3003, 310.2958, 292.2999, 280.3026, 60.0442</b>                                         |
| <b>245 Cer (d20:1/28:2(OH))</b> | <b>C48 H91 N O4</b> | <b>21.22 81.74 -4.48</b> | <b>746.7021 746.6990</b> | <b>728.6892, 328.3194, 310.3141, 292.3000, 280.3083, 60.0444</b>                                         |
| 246 Cer (t18:1/16:0)            | C34 H67 N O4        | 12.07 98.07 -0.36        | 554.5143 554.5140        | 536.5034, 518.4917, 500.4812, 488.4821, 316.2846, 298.2742, 280.2636, 262.2535, 250.2534, 60.0445        |
| <b>247 Cer (t18:1/16:1)</b>     | <b>C34 H65 N O4</b> | <b>11.36 80.67 0.67</b>  | <b>552.4986 552.4988</b> | <b>534.4856, 516.4770, 316.2805, 298.2729, 280.2632, 262.2532, 250.2522, 60.0438</b>                     |
| <b>248 Cer (t18:1/17:0)</b>     | <b>C35 H69 N O4</b> | <b>12.61 99.87 0.34</b>  | <b>568.5299 568.5297</b> | <b>550.5129, 532.5038, 514.4871, 502.4912, 316.2853, 298.2738, 280.2637, 262.2534, 250.2529, 60.0444</b> |

|     |                         |              |       |       |       |          |          |                                                                                                   |
|-----|-------------------------|--------------|-------|-------|-------|----------|----------|---------------------------------------------------------------------------------------------------|
| 249 | Cer (t18:1/18:0)        | C36 H71 N O4 | 12.90 | 99.97 | -0.14 | 582.5456 | 582.5457 | 564.5339, 546.5239, 528.5136, 316.2842, 298.2728, 280.2628, 262.2524, 250.2521, 60.0439           |
| 250 | Cer (t18:1/18:1)        | C36 H69 N O4 | 12.36 | 98.28 | -0.95 | 580.5299 | 580.5303 | 562.5187, 544.5075, 526.4959, 316.2841, 298.2731, 280.2626, 262.2523, 250.2522, 60.0439           |
| 251 | Cer (t18:1/18:2) isomer | C36 H67 N O4 | 11.68 | 98.06 | -0.26 | 578.5143 | 578.5140 | 560.4973, 542.4909, 524.4842, 512.4799, 316.2846, 298.2739, 280.2634, 262.2533, 250.2535, 60.0445 |
| 252 | Cer (t18:1/18:2)        | C36 H67 N O4 | 12.50 | 70.64 | 2.72  | 578.5143 | 578.5128 | 560.4902, 542.4856, 524.4864, 316.2840, 298.2732, 280.2627, 262.2526, 250.2529, 60.0439           |
| 253 | Cer (t18:1/18:3)        | C36 H65 N O4 | 12.10 | 96.31 | 1.76  | 576.4986 | 576.4976 | 558.4670, 522.4742, 316.2826, 298.2727, 280.2623, 262.2526, 250.2160, 60.0438                     |
| 254 | Cer (t18:1/18:4)        | C36 H63 N O4 | 12.25 | 84.80 | -2.39 | 574.4830 | 574.4811 | 556.4733, 538.4963, 526.4603, 316.2598, 298.2548, 280.2441, 262.2545, 250.2498, 60.0444           |
| 255 | Cer (t18:1/18:5)        | C36 H61 N O4 | 11.65 | 71.61 | -2.02 | 572.4673 | 572.4655 | 316.2662, 298.2726, 280.2635, 262.2536, 250.2538, 60.0444                                         |
| 256 | Cer (t18:1/19:0)        | C37 H73 N O4 | 13.97 | 72.22 | 1.09  | 596.5612 | 596.5609 | 578.5503, 560.5393, 316.2833, 298.2719, 280.2616, 262.2507, 250.2536, 60.0438                     |
| 257 | Cer (t18:1/20:0)        | C38 H75 N O4 | 14.53 | 89.85 | 2.91  | 610.5769 | 610.5751 | 592.5653, 574.5535, 556.5479, 316.2853, 298.2732, 280.2626, 262.2534, 250.2535, 60.0439           |
| 258 | Cer (t18:1/20:3)        | C38 H69 N O4 | 13.75 | 72.92 | -0.03 | 604.5299 | 604.5302 | 586.5114, 298.2549, 280.2431, 262.2524, 250.1978, 60.0438                                         |
| 259 | Cer (t18:1/21:0)        | C39 H77 N O4 | 15.18 | 67.91 | 2.25  | 624.5925 | 624.5937 | 606.5834, 588.5681, 570.5621, 316.2832, 298.2738, 280.2632, 262.2539, 250.2529, 60.0445           |
| 260 | Cer (t18:1/22:0)        | C40 H79 N O4 | 15.85 | 97.62 | 0.17  | 638.6082 | 638.6082 | 620.5952, 602.5859, 584.5758, 316.2848, 298.2741, 280.2635, 262.2532, 250.2532, 60.0445           |
| 261 | Cer (t18:1/22:2)        | C40 H75 N O4 | 15.06 | 60.13 | 4.36  | 634.5769 | 634.5737 | 616.5468, 598.5342, 316.2847, 298.2728, 280.2610, 262.2511,                                       |



|                                 |                     |              |              |              |                 |                 |                                                                                                   |                          |
|---------------------------------|---------------------|--------------|--------------|--------------|-----------------|-----------------|---------------------------------------------------------------------------------------------------|--------------------------|
|                                 |                     |              |              |              |                 |                 |                                                                                                   | <b>250.2529, 60.0438</b> |
| <b>262 Cer (t18:1/22:3)</b>     | <b>C40 H73 N O4</b> | <b>15.20</b> | <b>63.73</b> | <b>-1.93</b> | <b>632.5612</b> | <b>632.5615</b> | <b>316.2800, 298.2719, 280.2616, 262.2519, 250.2531, 60.0438</b>                                  |                          |
| <b>263 Cer (t18:1/22:4)</b>     | <b>C40 H71 N O4</b> | <b>14.78</b> | <b>83.30</b> | <b>-1.66</b> | <b>630.5456</b> | <b>630.5442</b> | <b>612.5304, 582.5223, 298.3091, 280.2625, 262.2531, 250.2537, 60.0445</b>                        |                          |
| 264 Cer (t18:1/23:0)            | C41 H81 N O4        | 16.50        | 92.67        | 0.77         | 652.6238        | 652.6242        | 634.6119, 616.6029, 598.5842, 316.2845, 298.2736, 280.2635, 262.2533, 250.2528, 60.0445           |                          |
| 265 Cer (t18:1/24:0)            | C42 H83 N O4        | 17.22        | 99.65        | 0.15         | 666.6395        | 666.6397        | 648.6274, 630.6160, 612.6058, 600.6070, 316.2843, 298.2740, 280.2634, 262.2533, 250.2533, 60.0445 |                          |
| 266 Cer (t18:1/24:1)            | C42 H81 N O4        | 16.02        | 69.30        | -5.37        | 664.6238        | 664.6203        | 646.6081, 628.6009, 610.5899, 316.2840, 298.2740, 280.2635, 262.2534, 250.2534, 60.0445           |                          |
| <b>267 Cer (t18:1/24:2)</b>     | <b>C42 H79 N O4</b> | <b>16.38</b> | <b>85.64</b> | <b>1.95</b>  | <b>662.6082</b> | <b>662.6066</b> | <b>644.5780, 626.5889, 316.2825, 298.2740, 280.2626, 262.2524, 250.2533, 60.0443</b>              |                          |
| 268 Cer (t18:1/25:0)            | C43 H85 N O4        | 17.92        | 89.09        | -1.61        | 680.6551        | 680.6538        | 662.6423, 644.6316, 626.6167, 316.2841, 298.2737, 280.2636, 262.2533, 250.2534, 60.0444           |                          |
| 269 Cer (t18:1/25:1)            | C43 H83 N O4        | 16.75        | 70.78        | 1.09         | 678.6395        | 678.6358        | 660.6205, 642.6185, 316.2843, 298.2730, 280.2629, 262.2528, 250.2533, 60.0439                     |                          |
| <b>270 Cer (t18:1/25:2)</b>     | <b>C43 H81 N O4</b> | <b>17.03</b> | <b>62.43</b> | <b>-0.21</b> | <b>676.6238</b> | <b>676.6210</b> | <b>658.6035, 316.2874, 298.2738, 280.2636, 262.252, 250.2522, 60.0444</b>                         |                          |
| <b>271 Cer (t18:1/28:2)</b>     | <b>C46 H87 N O4</b> | <b>18.82</b> | <b>74.21</b> | <b>-5.47</b> | <b>718.6708</b> | <b>718.6671</b> | <b>700.6501, 316.3009, 298.2650, 280.2623, 262.2535, 250.2530, 60.0446</b>                        |                          |
| <b>272 Cer (t19:1/18:2)</b>     | <b>C37 H69 N O4</b> | <b>13.13</b> | <b>60.05</b> | <b>0.69</b>  | <b>592.5299</b> | <b>592.5319</b> | <b>574.5200, 556.5060, 538.4960, 330.3001, 312.2902, 294.2776, 276.2682, 264.2690, 60.0444</b>    |                          |
| <b>273 Cer (t19:1/18:4)</b>     | <b>C37 H65 N O4</b> | <b>12.43</b> | <b>69.84</b> | <b>4.72</b>  | <b>588.4986</b> | <b>588.5018</b> | <b>570.4809, 552.5144, 540.4658, 330.2678, 312.2711, 294.2750, 276.2686, 264.2661, 60.0444</b>    |                          |
| <b>274 Cer (t19:1/24:3)</b>     | <b>C43 H79 N O4</b> | <b>16.48</b> | <b>63.51</b> | <b>0.95</b>  | <b>674.6082</b> | <b>674.6109</b> | <b>656.5833, 638.6259, 312.2902, 294.2796, 276.2683, 264.2689, 60.0444</b>                        |                          |
| <b>275 Cer (t18:1/14:0(OH))</b> | <b>C32 H63 N O5</b> | <b>10.60</b> | <b>84.32</b> | <b>-4.34</b> | <b>542.4779</b> | <b>542.4758</b> | <b>524.4441, 506.4253, 316.2635, 298.2735, 280.2637, 262.2541,</b>                                |                          |

|                                 |                     |              |              |              |                 |                 |                                                                                                          |                          |  |  |
|---------------------------------|---------------------|--------------|--------------|--------------|-----------------|-----------------|----------------------------------------------------------------------------------------------------------|--------------------------|--|--|
|                                 |                     |              |              |              |                 |                 |                                                                                                          | <b>250.2532, 60.0444</b> |  |  |
| 276 Cer (t18:1/16:0(OH))        | C34 H67 N O5        | 11.65        | 98.64        | -0.48        | 570.5092        | 570.5090        | 552.5002, 534.4891, 516.4795, 498.4646, 316.2839, 298.2745, 280.2638, 262.2539, 250.2532, 60.0446        |                          |  |  |
| <b>277 Cer (t18:1/17:1(OH))</b> | <b>C35 H67 N O5</b> | <b>10.88</b> | <b>69.44</b> | <b>2.17</b>  | <b>582.5092</b> | <b>582.5083</b> | <b>564.4905, 546.4905, 528.4662, 510.4205, 316.2708, 298.2720, 280.2633, 262.2536, 250.2218, 60.0438</b> |                          |  |  |
| 278 Cer (t18:1/18:0(OH))        | C36 H61 N O5        | 12.78        | 93.94        | 0.01         | 598.5405        | 598.5408        | 580.5296, 562.5184, 544.5077, 526.4997, 316.2731, 298.2731, 280.2628, 262.2527, 250.2529, 60.0439        |                          |  |  |
| <b>279 Cer (t18:1/18:1(OH))</b> | <b>C36 H69 N O5</b> | <b>11.80</b> | <b>80.41</b> | <b>1.31</b>  | <b>596.5249</b> | <b>596.5253</b> | <b>578.5137, 560.5027, 542.4910, 524.4786, 316.2838, 298.2731, 280.2626, 262.2529, 250.2523, 60.0439</b> |                          |  |  |
| <b>280 Cer (t18:1/18:2(OH))</b> | <b>C36 H67 N O5</b> | <b>11.31</b> | <b>76.49</b> | <b>-0.25</b> | <b>594.5092</b> | <b>594.5089</b> | <b>576.4935, 558.4820, 316.2872, 298.2740, 280.2632, 262.2531, 250.2535, 60.0444</b>                     |                          |  |  |
| 281 Cer (t18:1/20:0(OH))        | C38 H75 N O5        | 13.94        | 98.20        | -0.72        | 626.5718        | 626.5714        | 608.5597, 590.5487, 572.5378, 554.5298, 316.2840, 298.2738, 280.2635, 262.2532, 250.2534, 60.0444        |                          |  |  |
| <b>282 Cer (t18:1/20:1(OH))</b> | <b>C38 H73 N O5</b> | <b>12.91</b> | <b>81.77</b> | <b>3.62</b>  | <b>624.5562</b> | <b>624.5544</b> | <b>606.5258, 588.5149, 570.5020, 558.4867, 316.2678, 298.2537, 280.2629, 262.2524, 250.2495, 60.0439</b> |                          |  |  |
| 283 Cer (t18:1/21:0(OH))        | C39 H77 N O5        | 14.54        | 95.50        | -1.21        | 640.5875        | 640.5867        | 622.5744, 604.5642, 586.5536, 568.5433, 316.2847, 298.2737, 280.2631, 262.2534, 250.2532, 60.0444        |                          |  |  |
| 284 Cer (t18:1/22:0(OH))        | C40 H79 N O5        | 15.20        | 99.54        | -0.08        | 654.6031        | 654.6029        | 636.5919, 618.5810, 600.5713, 582.5578, 316.2846, 298.2743, 280.2639, 262.2537, 250.2534, 60.0446        |                          |  |  |
| 285 Cer (t18:1/22:1(OH))        | C40 H77 N O5        | 14.18        | 75.26        | -3.01        | 652.5875        | 652.5872        | 634.5772, 616.5650, 598.5531, 580.5426, 316.2847, 298.2741, 280.2636, 262.2534, 250.2533, 60.0445        |                          |  |  |
| <b>286 Cer (t18:1/22:2(OH))</b> | <b>C40 H75 N O5</b> | <b>13.31</b> | <b>79.69</b> | <b>2.01</b>  | <b>650.5718</b> | <b>650.5719</b> | <b>632.5596, 614.5493, 596.5443, 578.5311, 316.2829, 298.2727, 280.2643, 262.2515, 250.2188, 60.0438</b> |                          |  |  |

|            |                              |                     |              |              |              |                 |                 |                                                                                                             |
|------------|------------------------------|---------------------|--------------|--------------|--------------|-----------------|-----------------|-------------------------------------------------------------------------------------------------------------|
| 287        | Cer (t18:1/23:0(OH))         | C41 H81 N O5        | 15.90        | 98.18        | 0.04         | 668.6188        | 668.6186        | 650.6073, 632.5966, 614.5859, 596.5749, 316.2842, 298.2743, 280.2638, 262.2535, 250.2532, 60.0446           |
| 288        | Cer (t18:1/23:1(OH))         | C41 H79 N O5        | 14.85        | 99.57        | 0.34         | 666.6031        | 666.6034        | 648.5920, 630.5808, 612.5697, 600.5321, 594.5572, 316.2837, 298.2740, 280.2635, 262.2534, 250.253, 60.0445  |
| 289        | Cer (t18:1/24:0(OH))         | C42 H83 N O5        | 16.43        | 98.79        | -0.04        | 682.6344        | 682.6344        | 664.6237, 646.6129, 628.6019, 610.5907, 316.2845, 298.2748, 280.2642, 262.2537, 250.2535, 60.0445           |
| 290        | Cer (t18:1/24:1(OH))         | C42 H81 N O5        | 15.50        | 75.04        | -6.75        | 680.6188        | 680.6139        | 662.6078, 644.5969, 626.5858, 608.5744, 316.2844, 298.2744, 280.2640, 262.2538, 250.2533, 60.0446           |
| <b>291</b> | <b>Cer (t18:1/24:2(OH))</b>  | <b>C42 H79 N O5</b> | <b>15.76</b> | <b>70.31</b> | <b>-1.28</b> | <b>678.6031</b> | <b>678.6025</b> | <b>660.5742, 642.5699, 316.2881, 298.2753, 280.2623, 262.2536, 250.2531, 60.0445</b>                        |
| 292        | Cer (t18:1/25:0(OH))         | C43 H85 N O5        | 17.20        | 99.74        | -0.16        | 696.6501        | 696.6498        | 678.6384, 660.6277, 642.6169, 624.6067, 612.6059, 316.2839, 298.2742, 280.2637, 262.2535, 250.2531, 60.0445 |
| 293        | Cer (t18:1/25:1(OH))         | C43 H83 N O5        | 16.20        | 90.26        | -3.91        | 694.6344        | 694.6318        | 676.6216, 658.6117, 640.6023, 622.5935, 610.5932, 316.2849, 298.2743, 280.2636, 262.2536, 250.2534, 60.0445 |
| <b>294</b> | <b>Cer (t18:1/25:2(OH))</b>  | <b>C43 H81 N O5</b> | <b>16.41</b> | <b>79.78</b> | <b>0.90</b>  | <b>692.6188</b> | <b>692.6172</b> | <b>674.6149, 316.2841, 298.2736, 280.2631, 262.2531, 250.2528, 60.0444</b>                                  |
| 295        | Cer (t18:1/26:0(OH))         | C44 H87 N O5        | 17.97        | 94.21        | 0.28         | 710.6657        | 710.6655        | 692.6539, 674.6427, 656.6334, 638.6195, 316.2841, 298.2740, 280.2634, 262.2532, 250.2534, 60.0445           |
| 296        | Cer (t18:1/24:0(OH)) isomer  | C42 H83 N O5        | 16.70        | 91.89        | -3.09        | 682.6344        | 682.6363        | 316.2832, 298.2739, 280.2632, 262.2535, 250.2535, 60.0445                                                   |
| <b>297</b> | <b>Cer (t19:1/16:0(OH))</b>  | <b>C35 H69 N O5</b> | <b>12.38</b> | <b>73.27</b> | <b>-2.15</b> | <b>584.5249</b> | <b>584.5251</b> | <b>566.5127, 548.5035, 530.4901, 512.4839, 330.3000, 312.2896, 294.2784, 276.2682, 264.2679, 60.0444</b>    |
| <b>298</b> | <b>Cer (t19:1/18:0(OH))</b>  | <b>C37 H73 N O5</b> | <b>13.62</b> | <b>98.14</b> | <b>-0.08</b> | <b>612.5562</b> | <b>612.5563</b> | <b>594.5453, 576.5334, 558.5239, 540.5070, 330.2995, 312.2898, 294.2788, 276.2685, 264.2682, 60.0444</b>    |
| <b>299</b> | <b>Cer (t14:1/25:5(tOH))</b> | <b>C39 H67 N O7</b> | <b>13.47</b> | <b>96.18</b> | <b>1.13</b>  | <b>662.4990</b> | <b>662.5003</b> | <b>644.4842, 206.1907, 194.1889, 60.0444</b>                                                                |

|                           |               |       |       |       |          |          |                                                                                         |
|---------------------------|---------------|-------|-------|-------|----------|----------|-----------------------------------------------------------------------------------------|
| 300 Cer (t14:1/22:1(tOH)) | C36 H69 N O7  | 13.52 | 93.45 | -0.88 | 628.5147 | 628.5139 | 610.5070, 592.4891, 224.1960, 206.1904, 194.1867, 60.0446                               |
| 301 Cer (t18:1/23:5(tOH)) | C41 H71 N O7  | 15.62 | 96.85 | 1.61  | 690.5303 | 690.5315 | 672.5053, 654.5093, 298.2734, 280.2632, 262.2542, 250.2532, 60.0445                     |
| 302 Cer (t20:0/33:5(tOH)) | C53 H95 N O7  | 20.40 | 84.46 | -0.20 | 858.7181 | 858.7198 | 840.6983, 328.3243, 310.3140, 292.3008, 280.2970, 60.0444                               |
| 303 Cer (d16:0/35:1(dOH)) | C51 H101 N O5 | 17.57 | 88.25 | -2.28 | 808.7753 | 808.7726 | 790.7624, 772.7514, 754.7339, 742.6503, 292.3002, 274.2732, 256.2636, 60.0444           |
| 304 Cer (t14:1/16:1(dOH)) | C30 H57 N O6  | 10.45 | 88.75 | -4.41 | 528.4259 | 528.4237 | 510.4143, 492.4048, 224.2005, 206.1907, 194.1899, 60.0443                               |
| 305 Cer (t14:1/16:0(dOH)) | C30 H59 N O6  | 10.52 | 78.15 | -7.13 | 530.4415 | 530.4378 | 512.4034, 242.2020, 224.2008, 206.1905, 194.1910, 60.0444                               |
| 306 Cer (t14:1/22:1(dOH)) | C36 H69 N O6  | 14.23 | 89.45 | -2.04 | 612.5198 | 612.5184 | 594.4955, 206.1907, 60.0444                                                             |
| 307 Cer (t14:1/24:3(dOH)) | C38 H69 N O6  | 12.25 | 79.78 | 4.05  | 636.5198 | 636.5215 | 618.5123, 600.4934, 224.1984, 206.1905, 194.1917, 60.0445                               |
| 308 Cer (t14:1/25:3(dOH)) | C39 H71 N O6  | 12.40 | 85.88 | 4.23  | 650.5354 | 650.5378 | 632.4836, 614.5106, 596.4895, 206.1908, 194.1917, 60.0444                               |
| 309 Cer (t14:1/26:0(dOH)) | C40 H79 N O6  | 13.18 | 85.82 | 1.13  | 670.5980 | 670.5986 | 652.5095, 224.2007, 206.1906, 60.0442                                                   |
| 310 Cer (t18:0/23:4(dOH)) | C41 H75 N O6  | 12.68 | 75.74 | -1.98 | 678.5667 | 678.5640 | 660.5306, 642.5226, 624.5197, 606.5229, 588.5120, 282.2790, 264.2688, 252.2674, 60.0446 |
| 311 Cer (t18:0/42:1(dOH)) | C60 H117 N O6 | 25.19 | 93.66 | -2.24 | 948.8954 | 948.8931 | 930.8809, 912.8630, 894.8682, 318.3006, 300.2897, 282.2790, 264.2683, 252.2694, 60.0445 |
| 312 Cer (t18:1/24:0(dOH)) | C42 H83 N O6  | 15.20 | 89.04 | -0.56 | 698.6293 | 698.6294 | 680.6160, 662.6006, 644.5878, 626.5221, 298.2730, 280.2628, 262.2537, 250.2530, 60.0444 |
| 313 Cer (t18:1/29:2(dOH)) | C47 H89 N O6  | 17.30 | 84.29 | 1.08  | 764.6763 | 764.6775 | 746.6444, 728.6761, 298.2732, 280.2635, 262.2530, 250.2518, 60.0443                     |
| 314 Cer (t18:1/42:1(dOH)) | C60 H115 N O6 | 24.50 | 84.68 | -2.25 | 946.8797 | 946.8772 | 928.8625, 910.8667, 316.2841, 298.2740, 280.2623, 262.2525, 250.2535, 60.0442           |
| 315 Cer (d18:2/16:1)      | C34 H63 N O3  | 12.25 | 97.16 | 0.17  | 534.4881 | 534.4880 | 280.2631, 262.2531, 250.2532, 60.0445                                                   |
| 316 Cer (d18:2/16:2)      | C34 H61 N O3  | 11.65 | 71.45 | 0.24  | 532.4724 | 532.4732 | 514.4609, 496.4503, 484.4485, 298.2506, 280.2633, 262.2533, 250.2532, 60.0444           |

|                             |              |       |       |       |          |          |                                                                               |
|-----------------------------|--------------|-------|-------|-------|----------|----------|-------------------------------------------------------------------------------|
| 317 Cer (d18:2/16:3)        | C34 H59 N O3 | 11.61 | 63.60 | 3.70  | 530.4568 | 530.4543 | 298.2545, 280.2631, 262.2532, 250.2530, 60.0444                               |
| 318 Cer (d18:2/18:2)        | C36 H65 N O3 | 13.25 | 70.68 | -3.52 | 560.5037 | 560.5033 | 542.4927, 524.4891, 280.2626, 262.2525, 250.2527, 60.0438                     |
| 319 Cer (d18:2/18:3)        | C36 H63 N O3 | 12.82 | 88.60 | -3.35 | 558.4881 | 558.4860 | 540.4748, 280.2629, 262.2538, 250.2534, 60.0445                               |
| 320 Cer (d18:2/18:4)        | C36 H61 N O3 | 12.00 | 80.97 | 4.51  | 556.4724 | 556.4700 | 538.4693, 298.2719, 280.2615, 262.2525, 60.0439                               |
| 321 Cer (d18:2/20:4)        | C38 H65 N O3 | 12.76 | 69.46 | 7.36  | 584.5037 | 584.4994 | 566.4892, 262.2528, 250.1914, 60.0438                                         |
| 322 Cer (d18:2/20:5)        | C38 H63 N O3 | 10.80 | 70.99 | 1.35  | 582.4881 | 582.4878 | 298.2728, 280.2620, 262.2522, 250.2531, 60.0438                               |
| 323 Cer (d18:2/21:6)        | C39 H63 N O3 | 11.90 | 67.85 | 2.25  | 594.4881 | 594.4871 | 298.2737, 280.2622, 262.2519, 250.2525, 60.0438                               |
| 324 Cer (d18:2/22:2)        | C40 H73 N O3 | 16.05 | 62.40 | 0.06  | 616.5663 | 616.5636 | 598.5538, 568.5054, 298.2556, 280.2603, 262.2536, 250.2544, 60.0445           |
| 325 Cer (d18:2/22:3)        | C40 H71 N O3 | 15.32 | 80.34 | -4.22 | 614.5507 | 614.5483 | 596.5360, 566.5336, 280.2640, 262.2526, 250.2562, 60.0443                     |
| 326 Cer (d18:2/22:5)        | C40 H67 N O3 | 11.80 | 81.34 | -3.89 | 610.5194 | 610.522  | 592.5096, 574.4995, 298.2544, 280.2623, 262.2520, 250.2536, 60.0438           |
| 327 Cer (d18:2/23:2)        | C41 H75 N O3 | 16.64 | 70.34 | 1.23  | 630.5820 | 630.5814 | 298.2717, 280.2628, 262.2519, 250.2534, 60.0437                               |
| 328 Cer (d18:2/23:3)        | C41 H73 N O3 | 16.10 | 80.09 | 4.40  | 628.5663 | 628.5636 | 610.5100, 280.2624, 262.2528, 250.2525, 60.0444                               |
| 329 Cer (d18:2/23:5)        | C41 H69 N O3 | 12.38 | 76.57 | -4.00 | 624.5350 | 624.5379 | 606.5288, 588.5229, 280.2615, 262.2545, 250.2152, 60.4380                     |
| 330 Cer (d18:2/23:5) isomer | C41 H69 N O3 | 12.68 | 76.00 | -4.83 | 624.5350 | 624.5385 | 606.5261, 588.5153, 576.5145, 298.2692, 280.2668, 262.2523, 250.2538, 60.0438 |
| 331 Cer (d18:2/23:6)        | C41 H67 N O3 | 11.88 | 74.18 | -5.81 | 622.5194 | 622.5232 | 604.5097, 586.4975, 298.2719, 280.2618, 262.2653, 250.2506, 60.0438           |
| 332 Cer (d18:2/24:2)        | C42 H77 N O3 | 17.28 | 62.12 | 0.47  | 644.5976 | 644.5946 | 626.5802, 298.2727, 280.2618, 262.2527, 250.2538, 60.0445                     |
| 333 Cer (d18:2/24:3)        | C42 H75 N O3 | 16.76 | 71.64 | 4.65  | 642.5820 | 642.5793 | 624.5718, 606.6093, 280.2631, 262.2526, 250.2534, 60.0441                     |
| 334 Cer (d18:2/24:5)        | C42 H71 N O3 | 12.90 | 75.36 | -3.74 | 638.5507 | 638.5537 | 620.5418, 602.5312, 298.2736, 280.2616, 262.2525, 250.2528, 60.0439           |
| 335 Cer (d18:2/25:4)        | C43 H75 N O3 | 14.35 | 71.55 | -0.76 | 654.5820 | 654.5842 | 636.5842, 618.5721, 298.2722, 280.2618, 262.2542, 60.0438                     |
| 336 Cer (d18:2/25:5)        | C43 H73 N O3 | 13.50 | 66.86 | -3.43 | 652.5663 | 652.5705 | 634.5584, 616.5488, 280.2664, 262.2519, 250.2529, 60.0438                     |
| 337 Cer (d18:2/26:1)        | C44 H83 N O3 | 19.29 | 81.79 | 3.66  | 674.6446 | 674.6417 | 280.2630, 262.2520, 250.2538, 60.0444                                         |
| 338 Cer (d18:2/26:4) isomer | C44 H75 N O3 | 12.65 | 84.76 | -2.07 | 666.5820 | 666.5839 | 648.5699, 630.6019, 298.2825, 280.2615, 262.2528                              |

|                             |                     |              |              |              |                 |                 |                                                                            |
|-----------------------------|---------------------|--------------|--------------|--------------|-----------------|-----------------|----------------------------------------------------------------------------|
| 339 Cer (d18:2/26:4)        | C44 H75 N O3        | 14.65        | 84.28        | -3.52        | 666.5820        | 666.5842        | 648.5761, 630.5651, 298.2724, 280.2613, 262.2519, 60.0437                  |
| <b>340 Cer (d18:2/27:5)</b> | <b>C45 H77 N O3</b> | <b>14.60</b> | <b>67.44</b> | <b>-6.98</b> | <b>680.5976</b> | <b>680.6025</b> | <b>662.5883, 644.5798, 298.2722, 280.2623, 262.2522, 250.2533, 60.0438</b> |
| <b>341 Cer (d18:2/27:6)</b> | <b>C45 H75 N O3</b> | <b>13.80</b> | <b>66.51</b> | <b>-5.37</b> | <b>678.5820</b> | <b>678.5849</b> | <b>660.5730, 642.5627, 298.2722, 280.2631, 262.2530, 250.2154, 60.0439</b> |
| <b>342 Cer (d18:2/28:5)</b> | <b>C46 H79 N O3</b> | <b>15.10</b> | <b>71.25</b> | <b>-4.67</b> | <b>694.6133</b> | <b>694.6169</b> | <b>676.6053, 658.5963, 298.2730, 280.2623, 262.2525, 250.2523, 60.0438</b> |
| <b>343 Cer (d18:2/29:5)</b> | <b>C47 H81 N O3</b> | <b>15.65</b> | <b>75.84</b> | <b>-4.36</b> | <b>708.6289</b> | <b>708.6324</b> | <b>690.6200, 672.6090, 298.2757, 280.2621, 262.2526, 250.2538, 60.0438</b> |
| <b>344 Cer (d18:2/29:6)</b> | <b>C47 H79 N O3</b> | <b>14.80</b> | <b>75.21</b> | <b>-5.34</b> | <b>706.6133</b> | <b>706.6174</b> | <b>688.6041, 670.5932, 298.2761, 280.2622, 262.2523, 250.2517, 60.0438</b> |
| <b>345 Cer (d18:2/32:5)</b> | <b>C50 H87 N O3</b> | <b>16.97</b> | <b>80.75</b> | <b>-2.99</b> | <b>750.6759</b> | <b>750.6785</b> | <b>732.6651, 714.6544, 298.2742, 280.2615, 262.2526, 60.0437</b>           |
| <b>346 Cer (d18:2/32:6)</b> | <b>C50 H85 N O3</b> | <b>16.00</b> | <b>80.28</b> | <b>-2.62</b> | <b>748.6602</b> | <b>748.6627</b> | <b>730.6497, 712.6394, 298.2758, 280.2614, 262.2520, 60.0435</b>           |

\* 171 SPLs that were bolded in table were identified in this study firstly.

**Figure S1.** Base peak chromatograms (BPC) of blank sample (A), sphingoid base fraction (B) and ceramide fraction (C). The extracted compound chromatograms (labeled above BPC) obtained on UHPLC-UHD-Q-TOF-MS after separation of sphingoid base and ceramide fractions by using silica gel and amino silica gel column chromatographies.

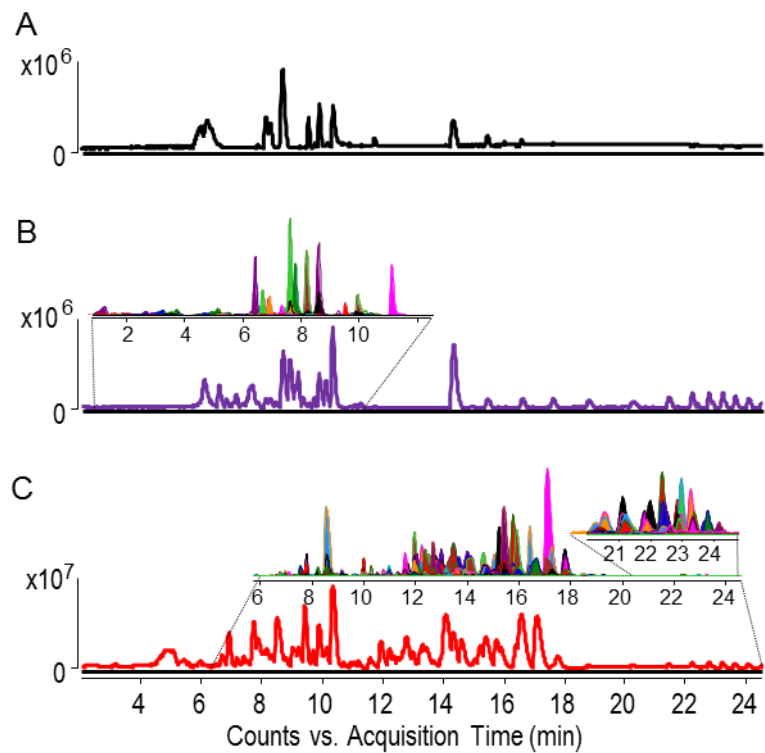

**Figure S2.** Comparison of extracted ion chromatographies (EICs) of representative SPLs in samples before and after silica gel and amino silica gel column chromatographies separation.

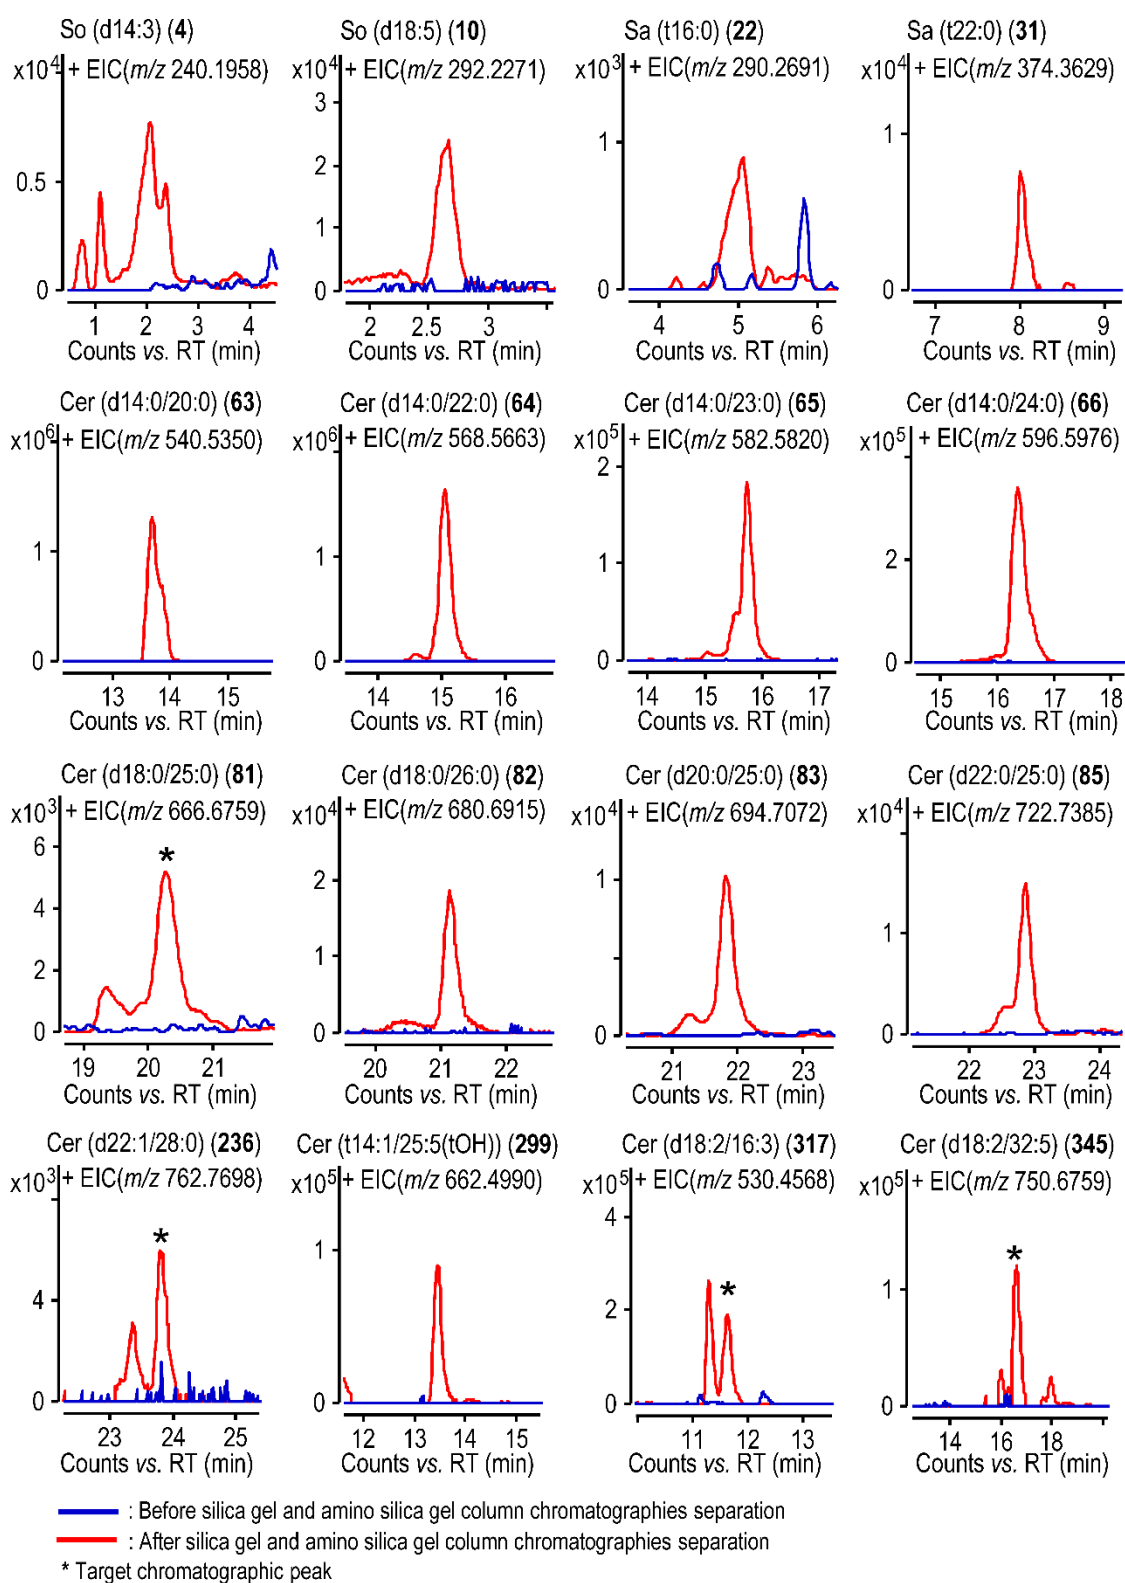



Figure S3. The *de novo* sphingolipid biosynthetic pathway.

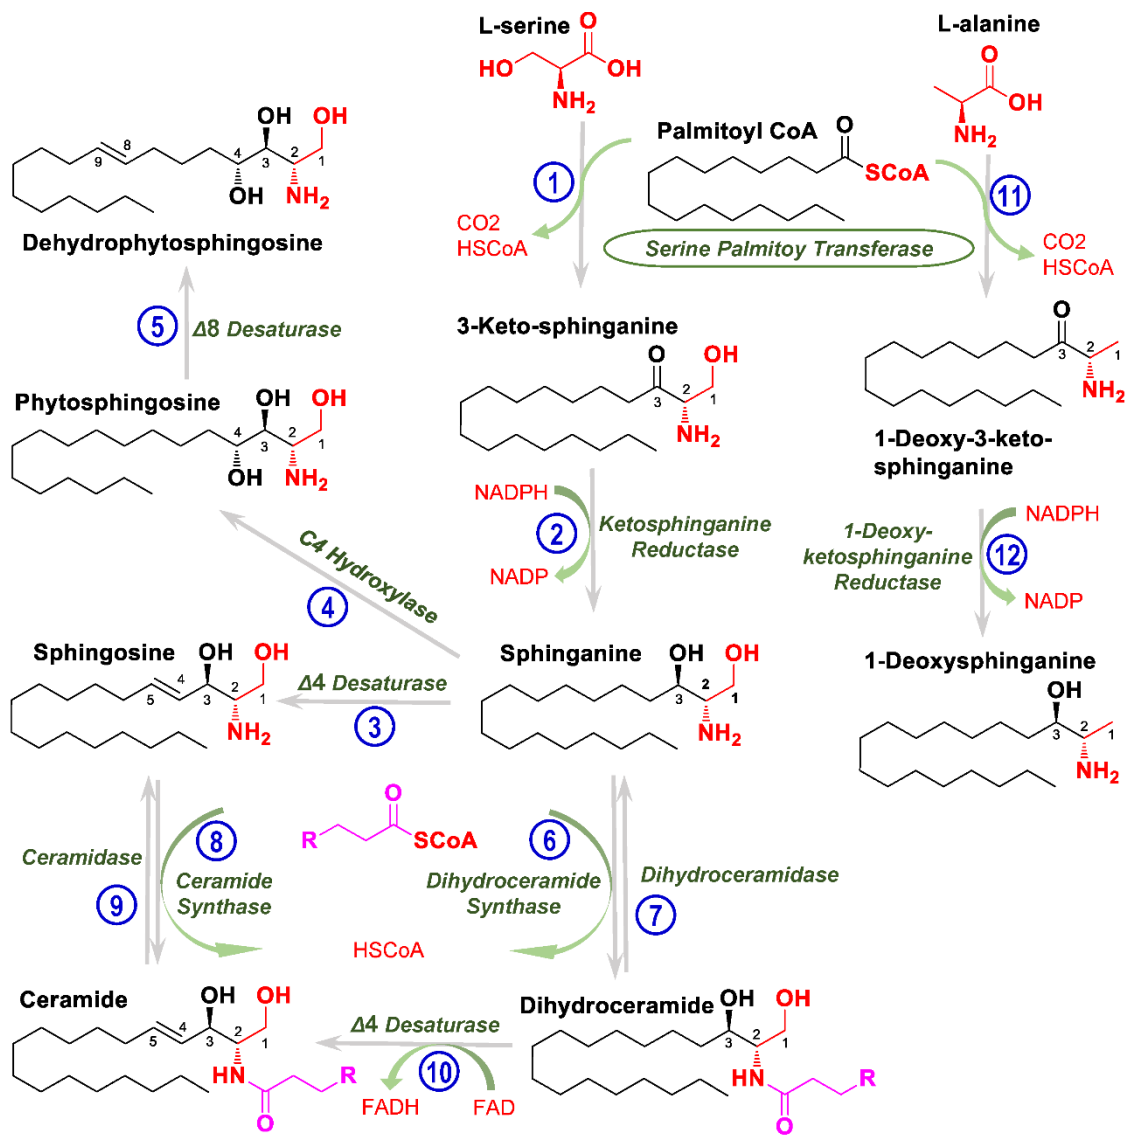

**Figure S4.** The synthetic reactions of 3 SPLs in this work. Hydrogenation ( $H_2$ , 10% Pd/C, MeOH) of the unsaturated SPL standards afforded saturated SPLs which were identified by UHPLC-UHD-Q-TOF-MS.

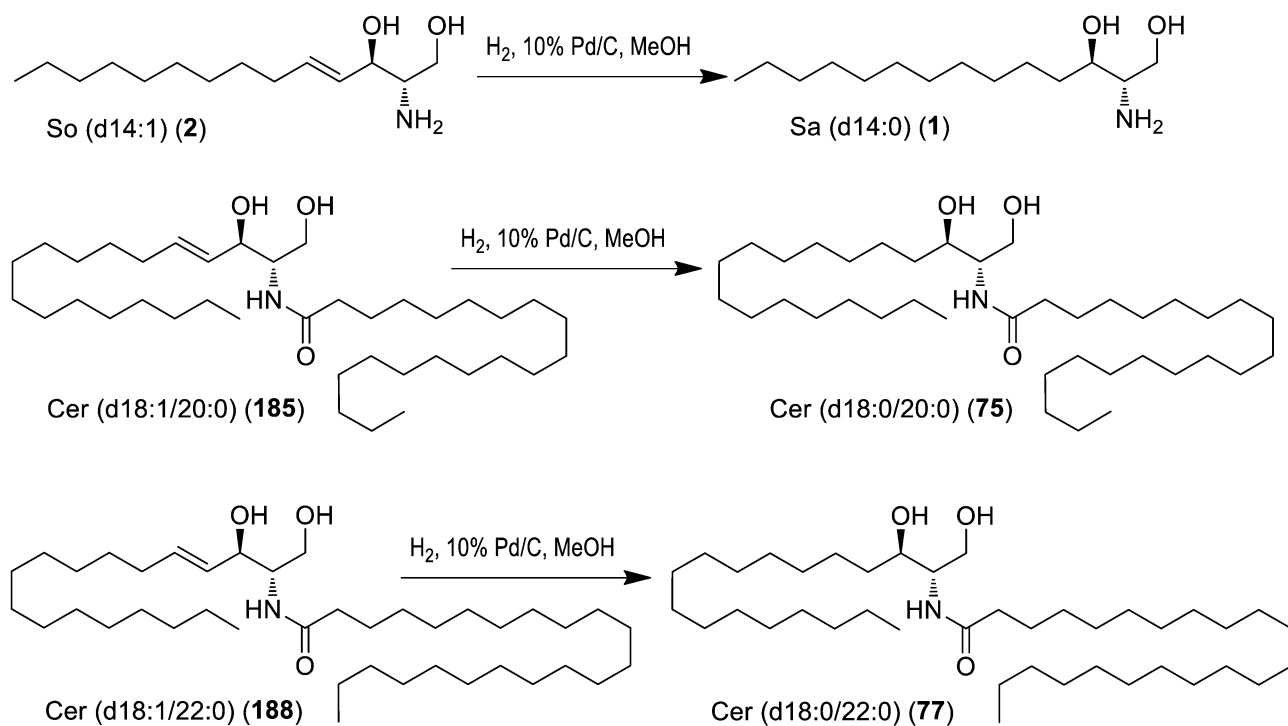

**Figure S5.** Comparison of the UHPLC RT values between 6 sphingoid bases and 16 ceramides in wild Cordyceps and corresponding SPL standards.

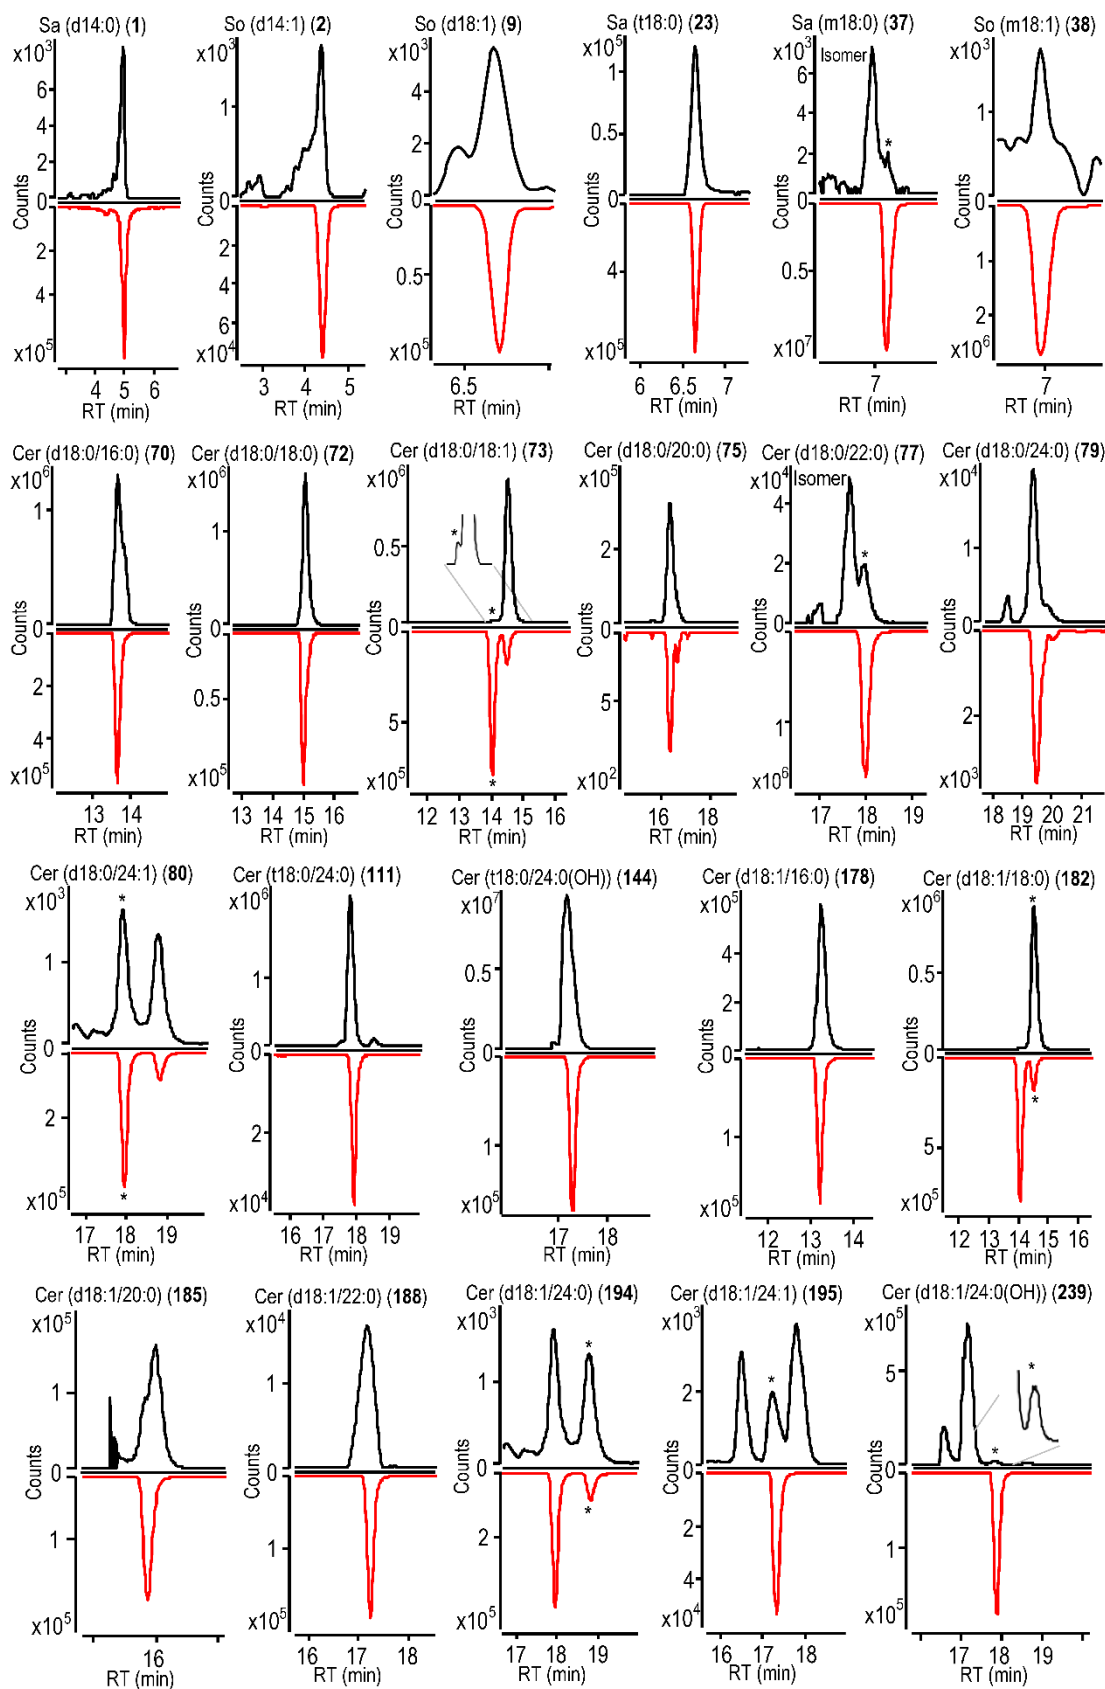

**Figure S6.** The chromatographic retention time rule of ceramides. X-axis stands for the number of carbon atoms in N-acyl chain of ceramides; Y-axis stands for retention time.

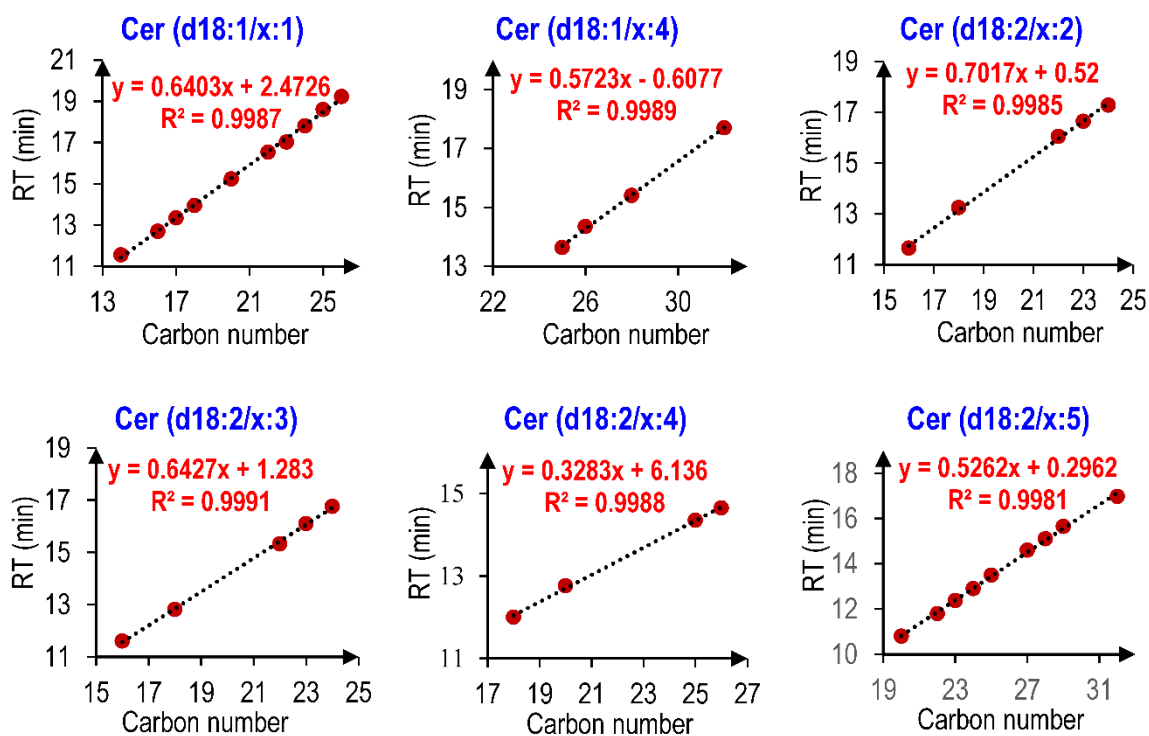

**Figure S7.** Effects of FTY720 and sphingoid base and ceramide fractions on the proliferation inhibition ratio in LPS-induced mouse splenic lymphocytes (A) and Con A-induced mouse splenic lymphocytes (B). Data were presented as the mean  $\pm$  SD of five independent experiments.

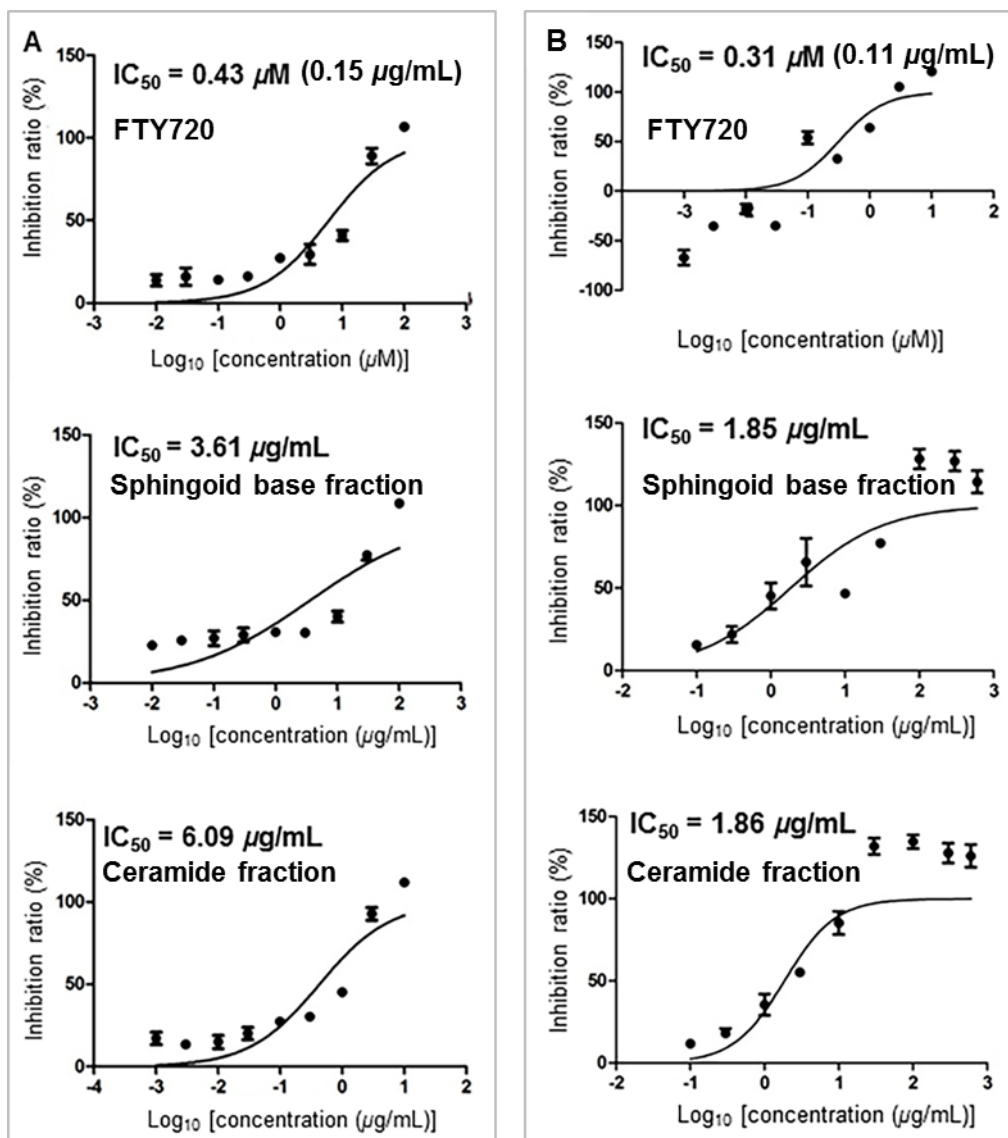

Supplement: srep38641-s1.pdf [file srep38641-s1.pdf]
